# Supplementary material for: Formation and metabolism of oxysterols and cholestenoic acids found in the mouse circulation: Lessons learnt from deuterium-enrichment experiments and the CYP46A1 transgenic mouse
Source: PubMed Central journal article supplement (PMC6880786; doi:10.1016/j.jsbmb.2019.105475), 2019-12

Figure S1

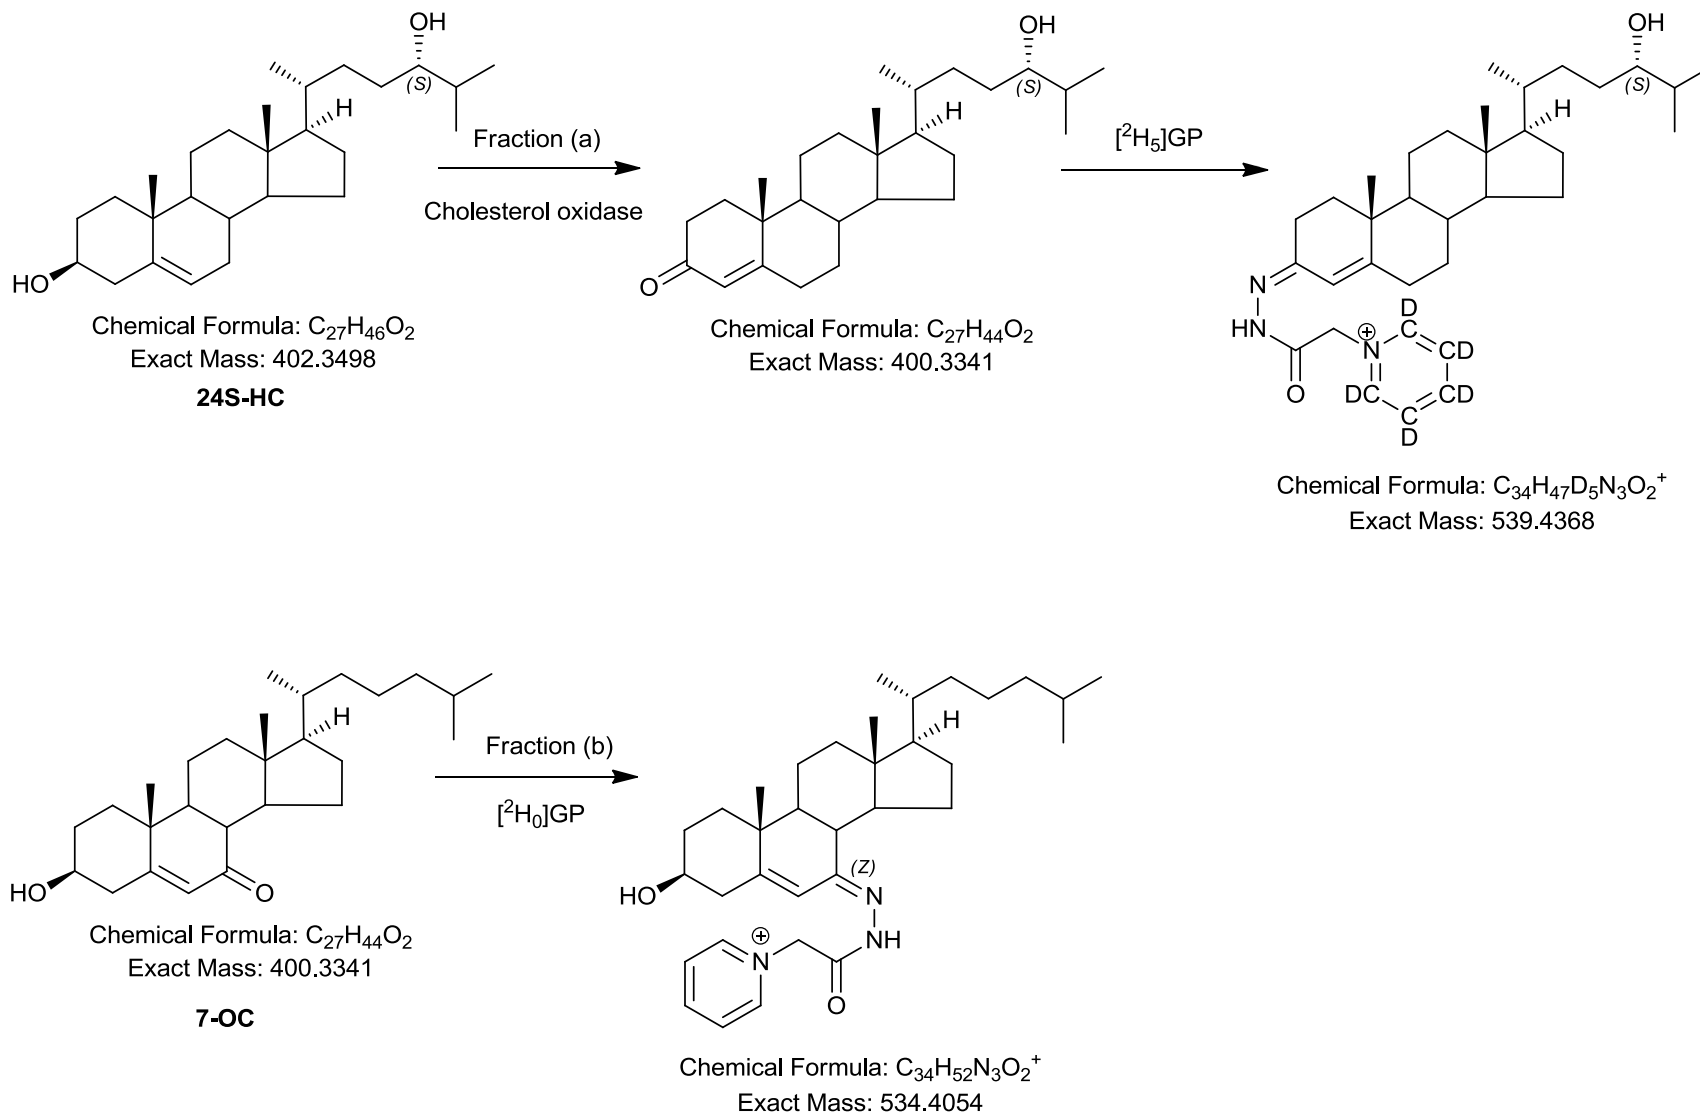

pc\_plasma\_bjorkem\_mouse\_fed-chole-d6\_n...

12/02/13 16:27:20

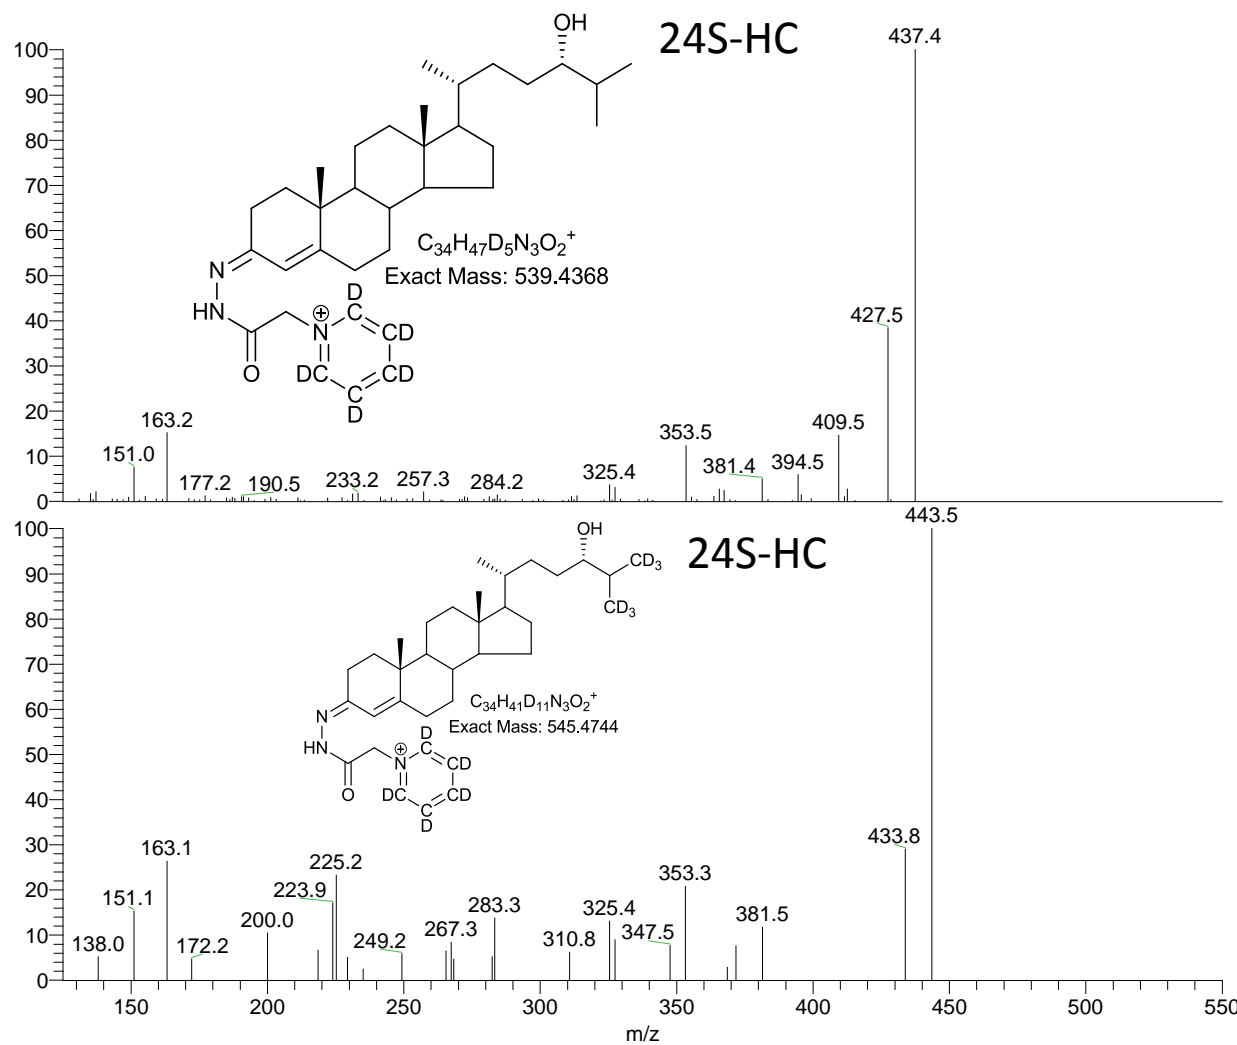

NL: 1.42E3

PC\_Plasma\_Bjorkem\_Mouse\_Fed-Chol-D6\_No-24OHC-D7\_Fr1a-GPd5\_fr1b-GPd0\_131202\_02#1512 RT: 7.37 AV: 1 F: ITMS + c ESI Full ms3 539.44@cid30.00 455.36@cid35.00 [125.00-545.00]

[<sup>2</sup>H<sub>0</sub>]

NL: 7.69E1

pc\_plasma\_bjorkem\_mouse\_fed-chole-d6\_no-24ohc-d7\_fr1a-gpd5\_fr1b-gpd0\_131202\_11#1449 RT: 7.35 AV: 1 F: ITMS + c ESI Full ms3 545.47@cid30.00 461.40@cid35.00 [125.00-550.00]

[<sup>2</sup>H<sub>6</sub>]

pc\_plasma\_bjorkem\_mouse\_fed-chole-d6\_n...

12/02/13 16:27:20

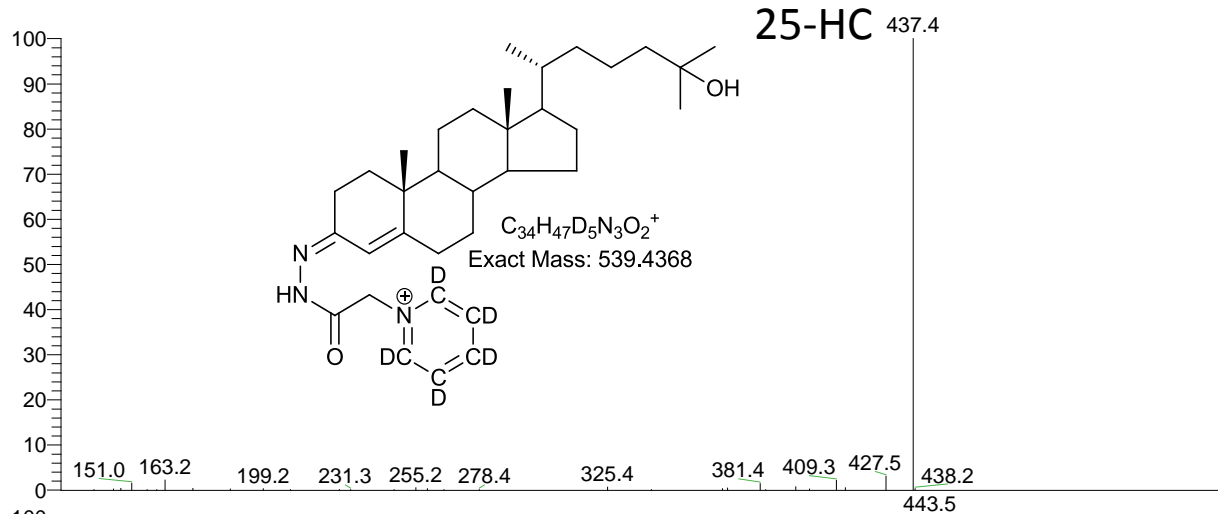

NL: 2.02E3

PC\_Plasma\_Bjorkem\_Mouse\_Fed-Chol-D6\_No-24OHC-D7\_Fr1a-GPd5\_fr1b-GPd0\_131202\_02#1545 RT: 7.53 AV: 1 F: ITMS + c ESI Full ms3 539.44@cid30.00 455.36@cid35.00 [125.00-545.00]

[ $^2H_0$ ]

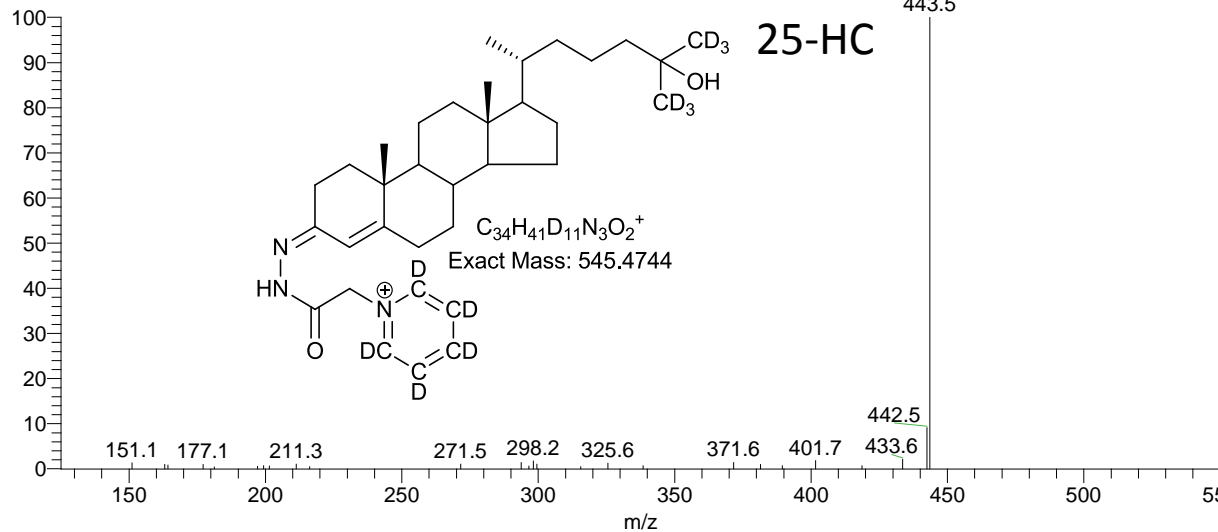

NL: 6.49E2

pc\_plasma\_bjorkem\_mouse\_fed-chole-d6\_no-24ohc-d7\_fr1a-gpd5\_fr1b-gpd0\_131202\_11#1482 RT: 7.52 AV: 1 F: ITMS + c ESI Full ms3 545.47@cid30.00 461.40@cid35.00 [125.00-550.00]

[ $^2H_6$ ]

PC\_Plasma\_Bjorkem\_Mouse\_Fed-Chol-D6\_N...

12/02/13 11:57:45

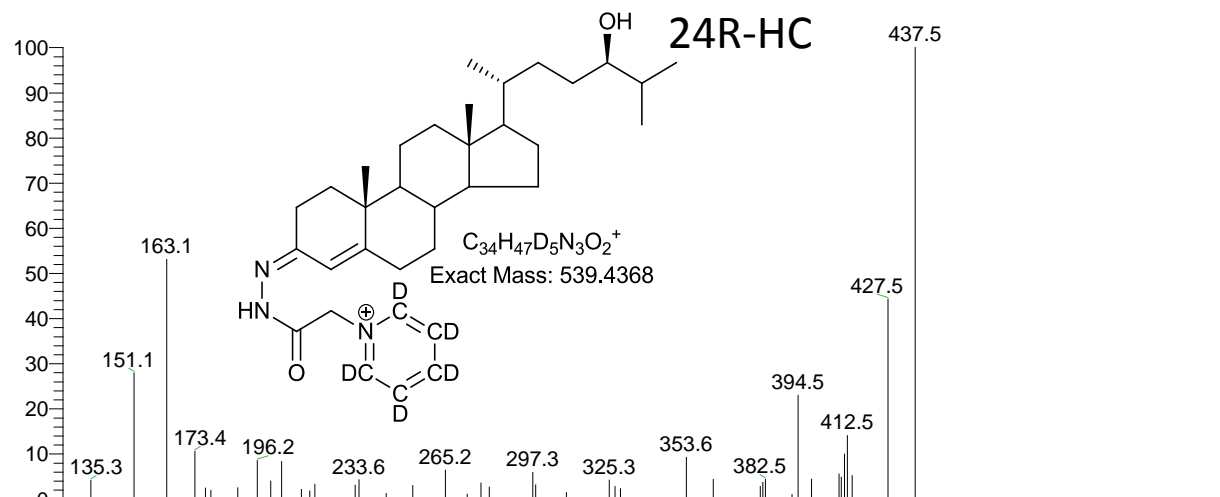

NL: 1.62E2

PC\_Plasma\_Bjorkem\_Mouse\_Fed-Chol-D6\_No-24OHC-D7\_Fr1a-GPd5\_fr1b-GPd0\_131202\_02#1611 RT: 7.85 AV: 1 F: ITMS + c ESI Full ms3 539.44@cid30.00 455.36@cid35.00 [125.00-545.00]

 $[^2H_0]$ 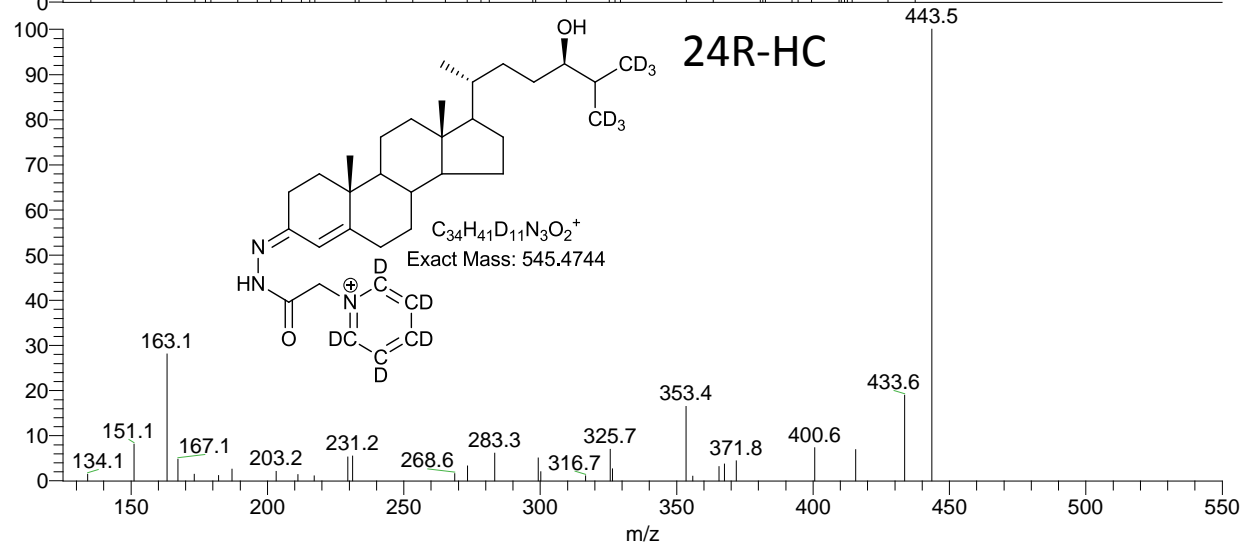

NL: 2.15E2

pc\_plasma\_bjorkem\_mouse\_fed-chole-d6\_no-24ohc-d7\_fr1a-gpd5\_fr1b-gpd0\_131202\_11#1539 RT: 7.81 AV: 1 F: ITMS + c ESI Full ms3 545.47@cid30.00 461.40@cid35.00 [125.00-550.00]

 $[^2H_6]$

pc\_plasma\_bjorkem\_mouse\_fed-chole-d6\_n...

12/02/13 16:48:04

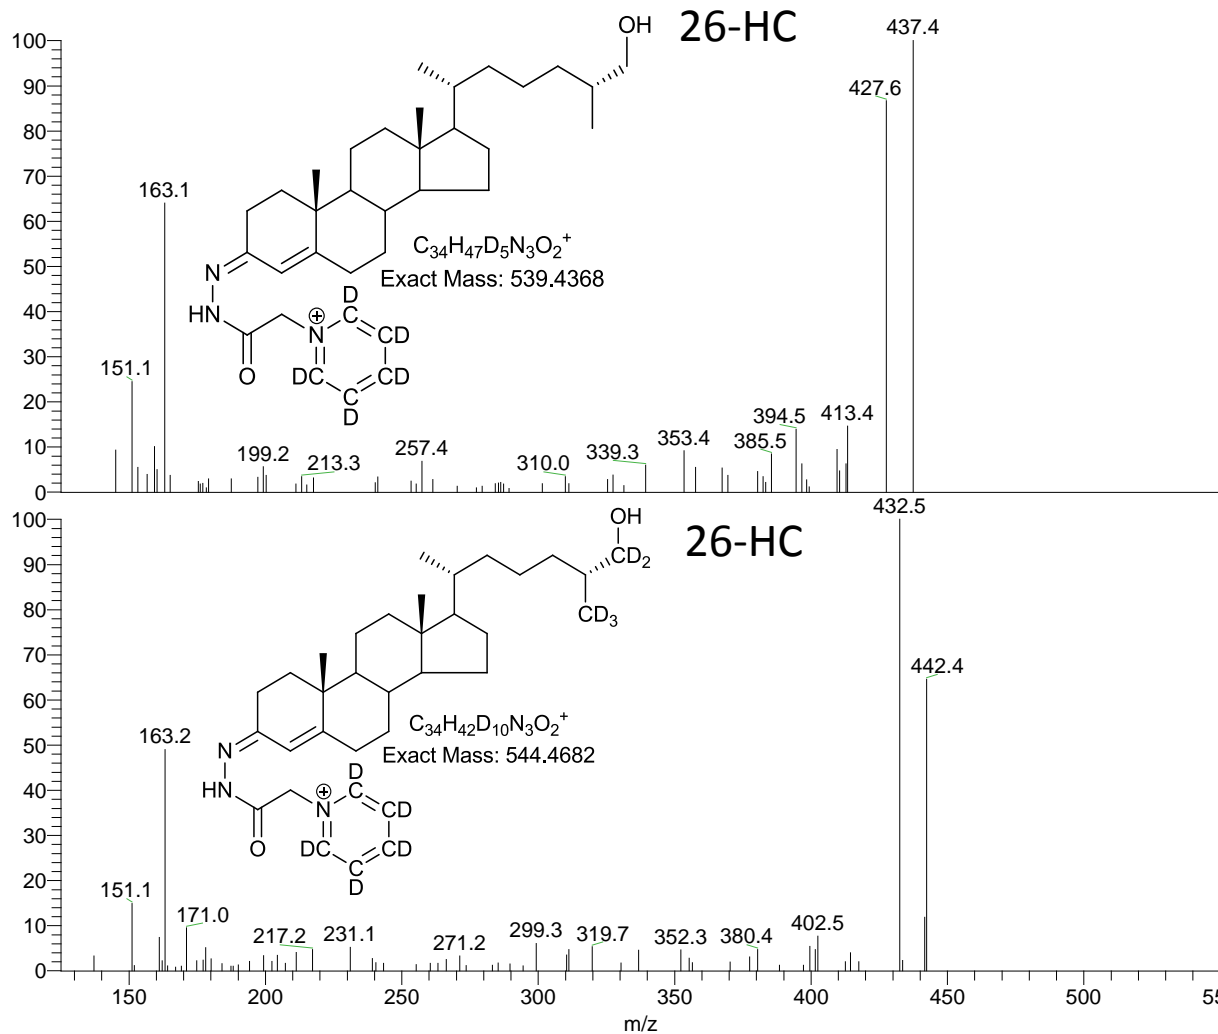

NL: 1.94E2

PC\_Plasma\_Bjorkem\_Mouse\_Fed-Chol-D6\_No-24OHC-D7\_Fr1a-GPd5\_fr1b-GPd0\_131202\_02#1626 RT: 7.92 AV: 1 F: ITMS + c ESI Full ms3 539.44@cid30.00 455.36@cid35.00 [125.00-545.00]

[<sup>2</sup>H<sub>0</sub>]

NL: 2.41E2

pc\_plasma\_bjorkem\_mouse\_fed-chole-d6\_no-24ohc-d7\_fr1a-gpd5\_fr1b-gpd0\_131202\_12#1629 RT: 7.88 AV: 1 F: ITMS + c ESI Full ms3 544.42@cid30.00 460.73@cid35.00 [125.00-550.00]

[<sup>2</sup>H<sub>5</sub>]

PC\_Plasma\_Bjorkem\_Mouse\_Fed-Chol-D6\_N...

12/02/13 11:57:45

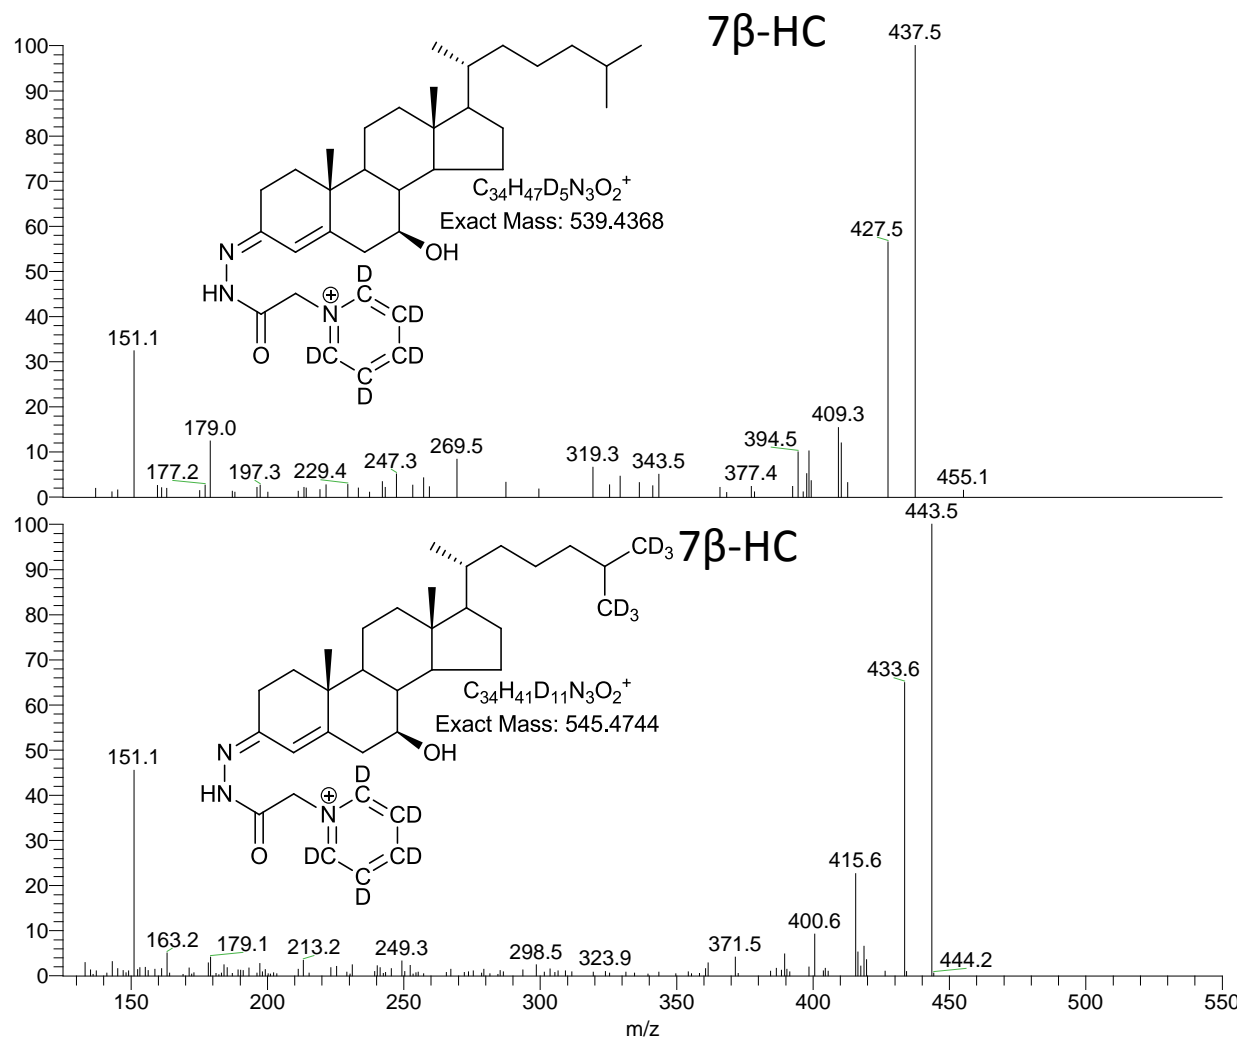

NL: 2.63E2

PC\_Plasma\_Bjorkem\_Mouse\_Fed-Chol-D6\_No-24OHC-D7\_Fr1a-GPd5\_fr1b-GPd0\_131202\_02#1992 RT: 9.58 AV: 1 F: ITMS + c ESI Full ms3 539.44@cid30.00 455.36@cid35.00 [125.00-545.00]

 $[^2H_0]$ 

NL: 8.06E2

pc\_plasma\_bjorkem\_mouse\_fed-chole-d6\_no-24ohc-d7\_fr1a-gpd5\_fr1b-gpd0\_131202\_11#1914 RT: 9.58 AV: 1 F: ITMS + c ESI Full ms3 545.47@cid30.00 461.40@cid35.00 [125.00-550.00]

 $[^2H_6]$

pc\_plasma\_bjorkem\_mouse\_fed-chole-d6\_n...

12/02/13 16:27:20

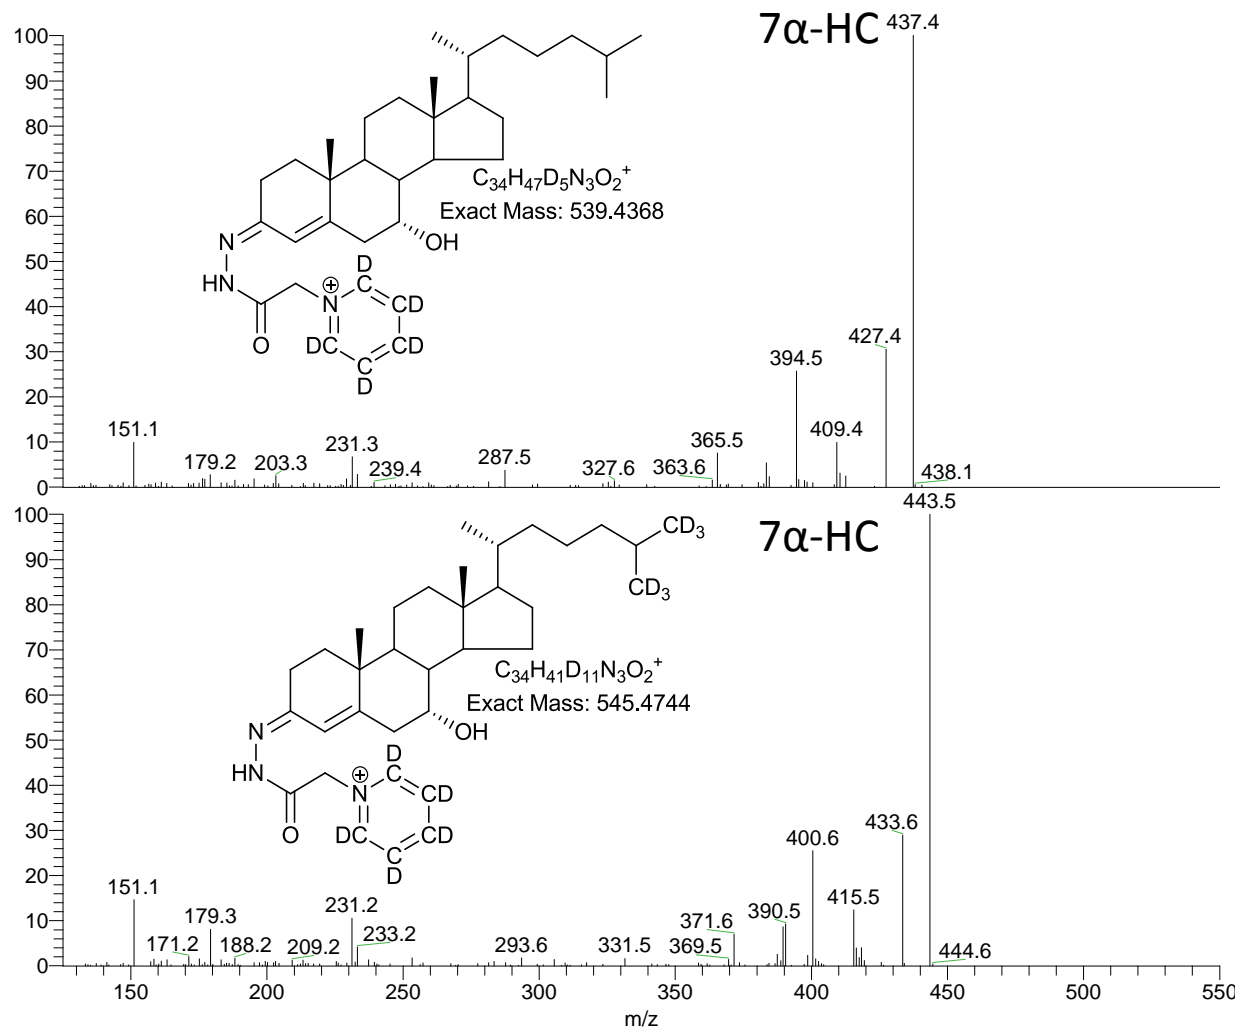

NL: 1.96E3

PC\_Plasma\_Bjorkem\_Mouse\_Fed-Chol-D6\_No-24OHC-D7\_Fr1a-GPd5\_fr1b-GPd0\_131202\_02#2142 RT: 10.16 AV: 1 F: ITMS + c ESI Full ms3 539.44@cid30.00 455.36@cid35.00 [125.00-545.00]

 $[^2H_0]$ 

NL: 1.85E3

pc\_plasma\_bjorkem\_mouse\_fed-chole-d6\_no-24ohc-d7\_fr1a-gpd5\_fr1b-gpd0\_131202\_11#2055 RT: 10.15 AV: 1 F: ITMS + c ESI Full ms3 545.47@cid30.00 461.40@cid35.00 [125.00-550.00]

 $[^2H_6]$

Figure S3

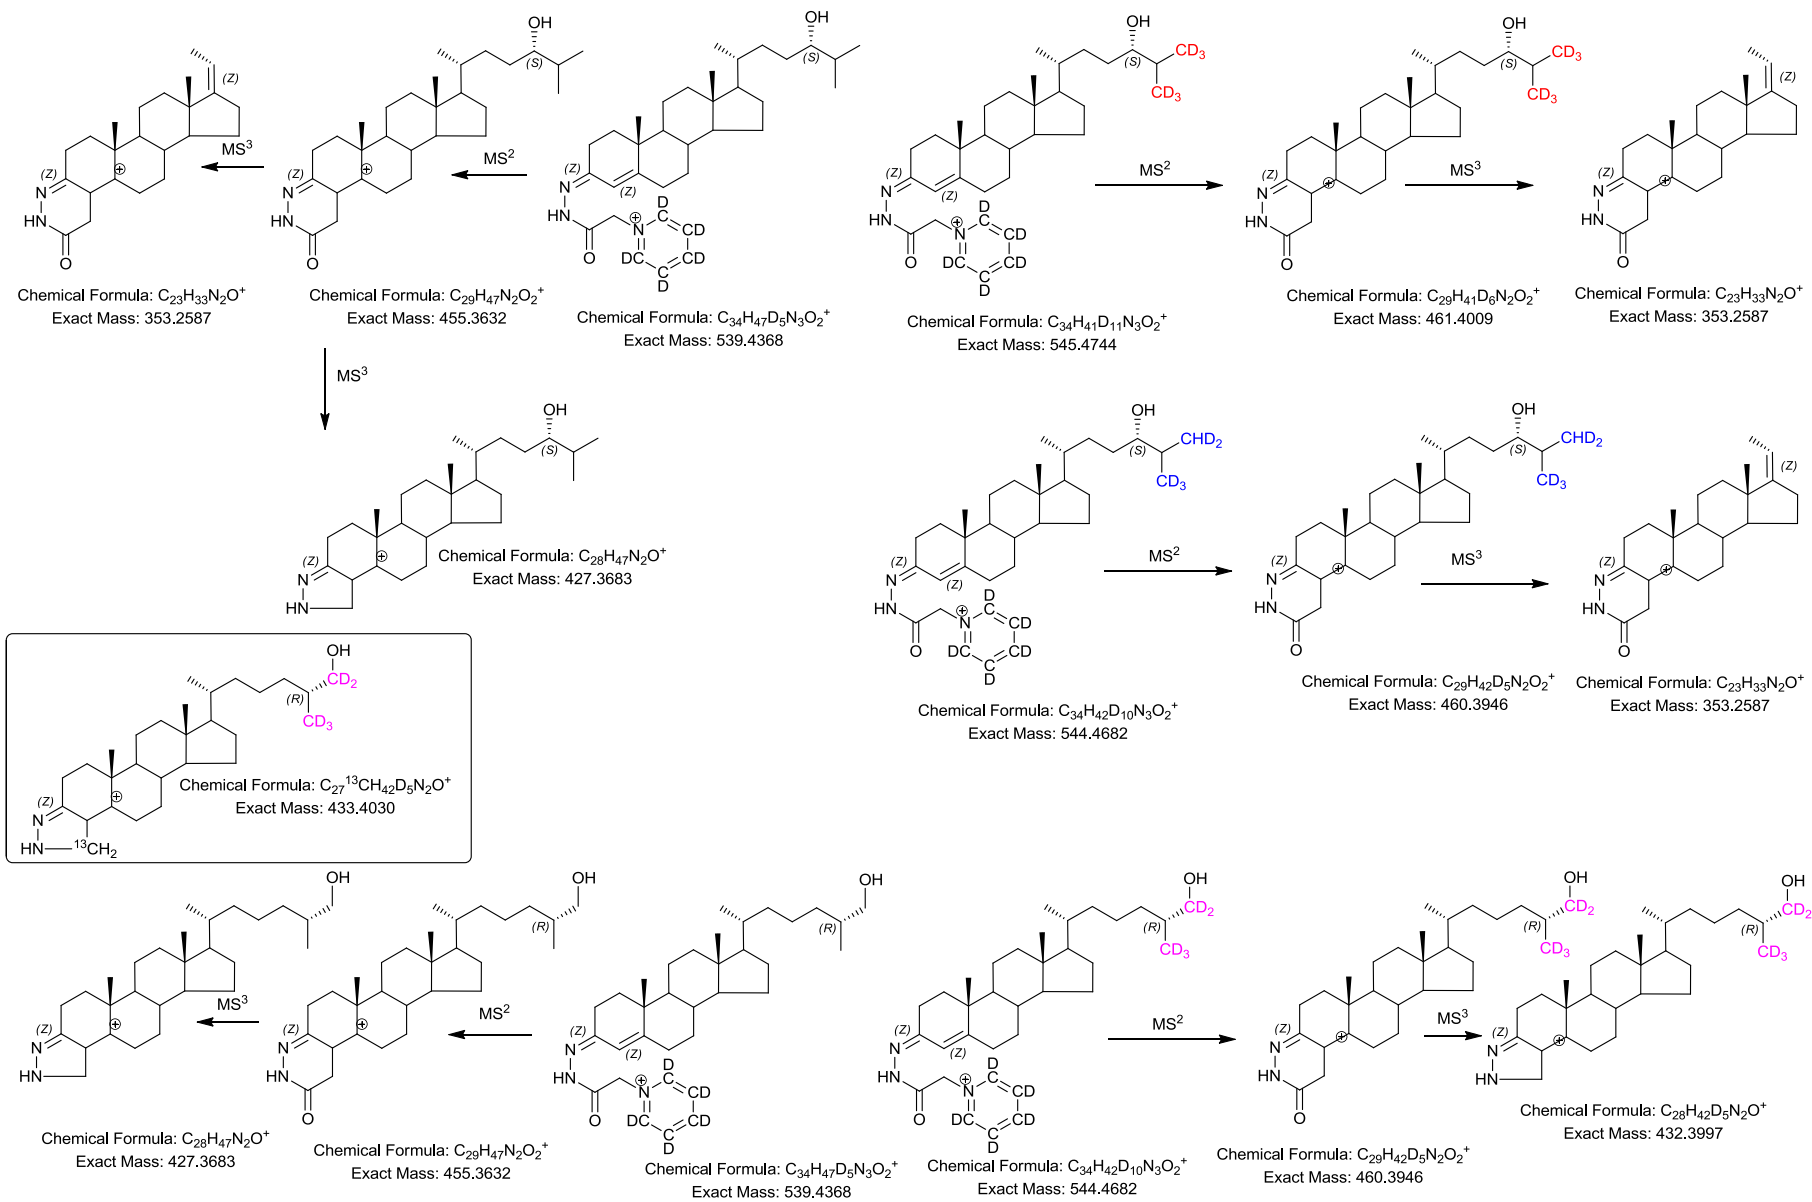



PC\_Plasma\_Bjorkem\_Mouse\_Fed-Chol-D6\_N...

12/02/13 12:18:30

PC\_Plasma\_Bjorkem\_Mouse\_Fed-Chol-D6\_No-24OHC-D7\_Fr1a-GPd5

45-1499 RT: 7.03-7.29 AV: 18 NL: 1.31E1

F: ITMS + c ESI Full ms3 553.42@cid30.00 469.34@cid35.00 [125.00-5]

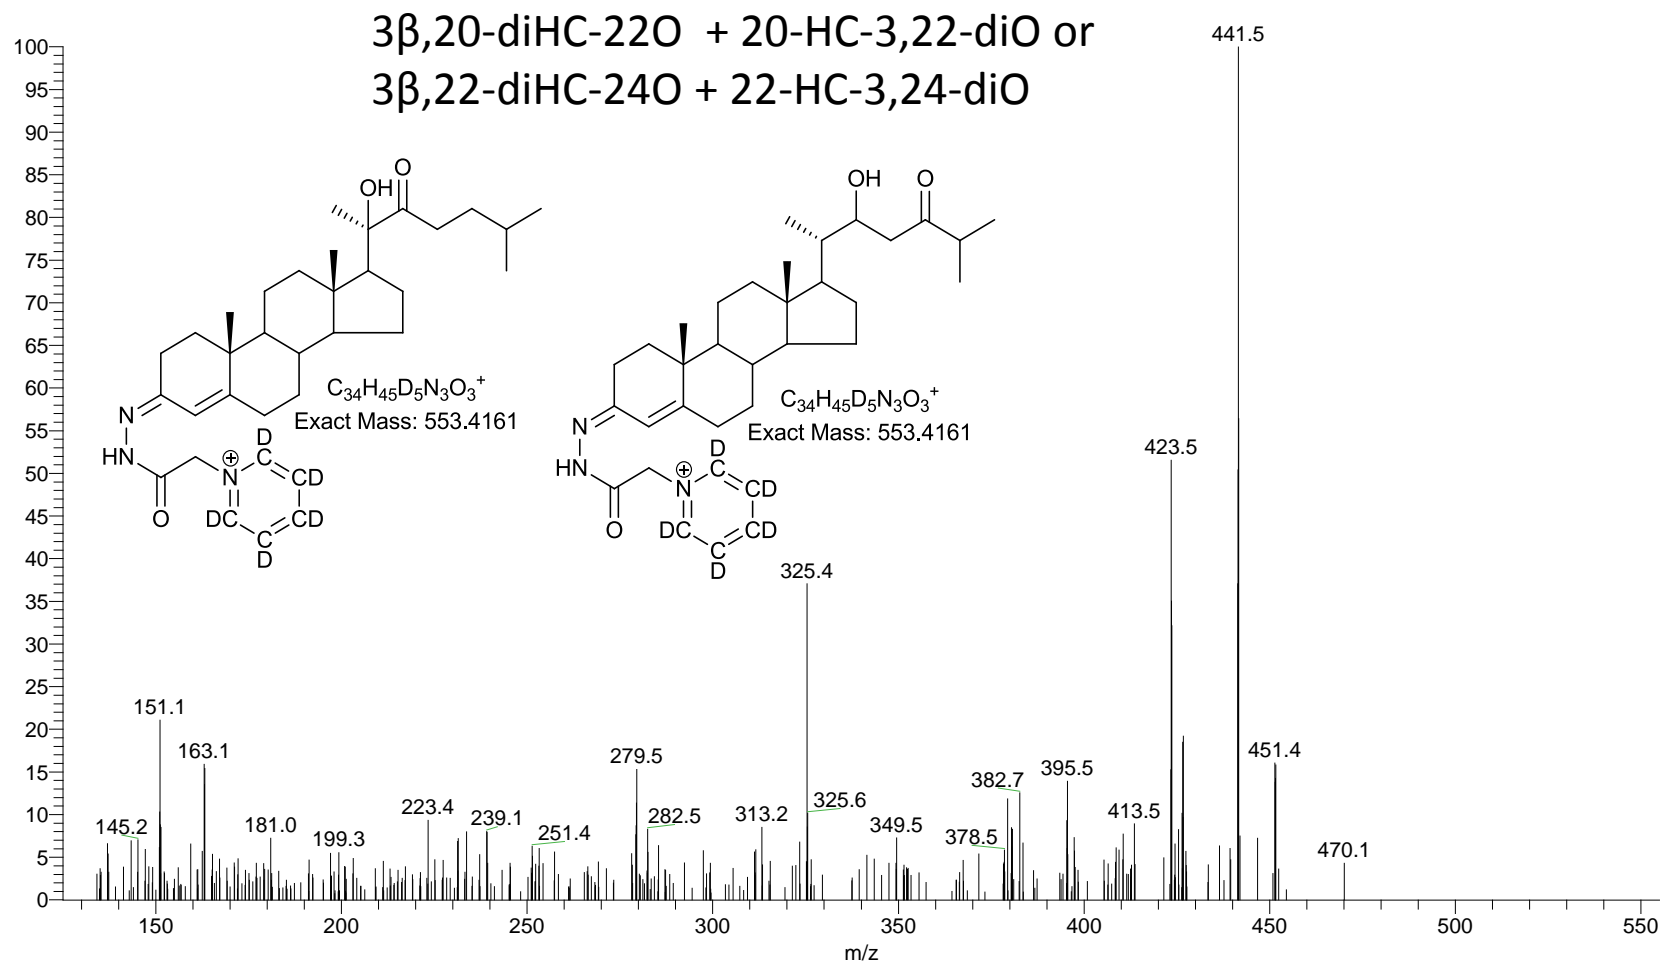

PC\_Plasma\_Bjorkem\_Mouse\_Fed-Chol-D6\_N...

12/02/13 12:59:55

PC\_Plasma\_Bjorkem\_Mouse\_Fed-Chol-D6\_No-24OHC-D7\_Fr1a-GPd5

F: ITMS + c ESI Full ms3 569.41@cid30.00 485.34@cid35.00 [130.00-5:

3-1002 RT: 4.71-4.85 AV: 10 NL: 7.79

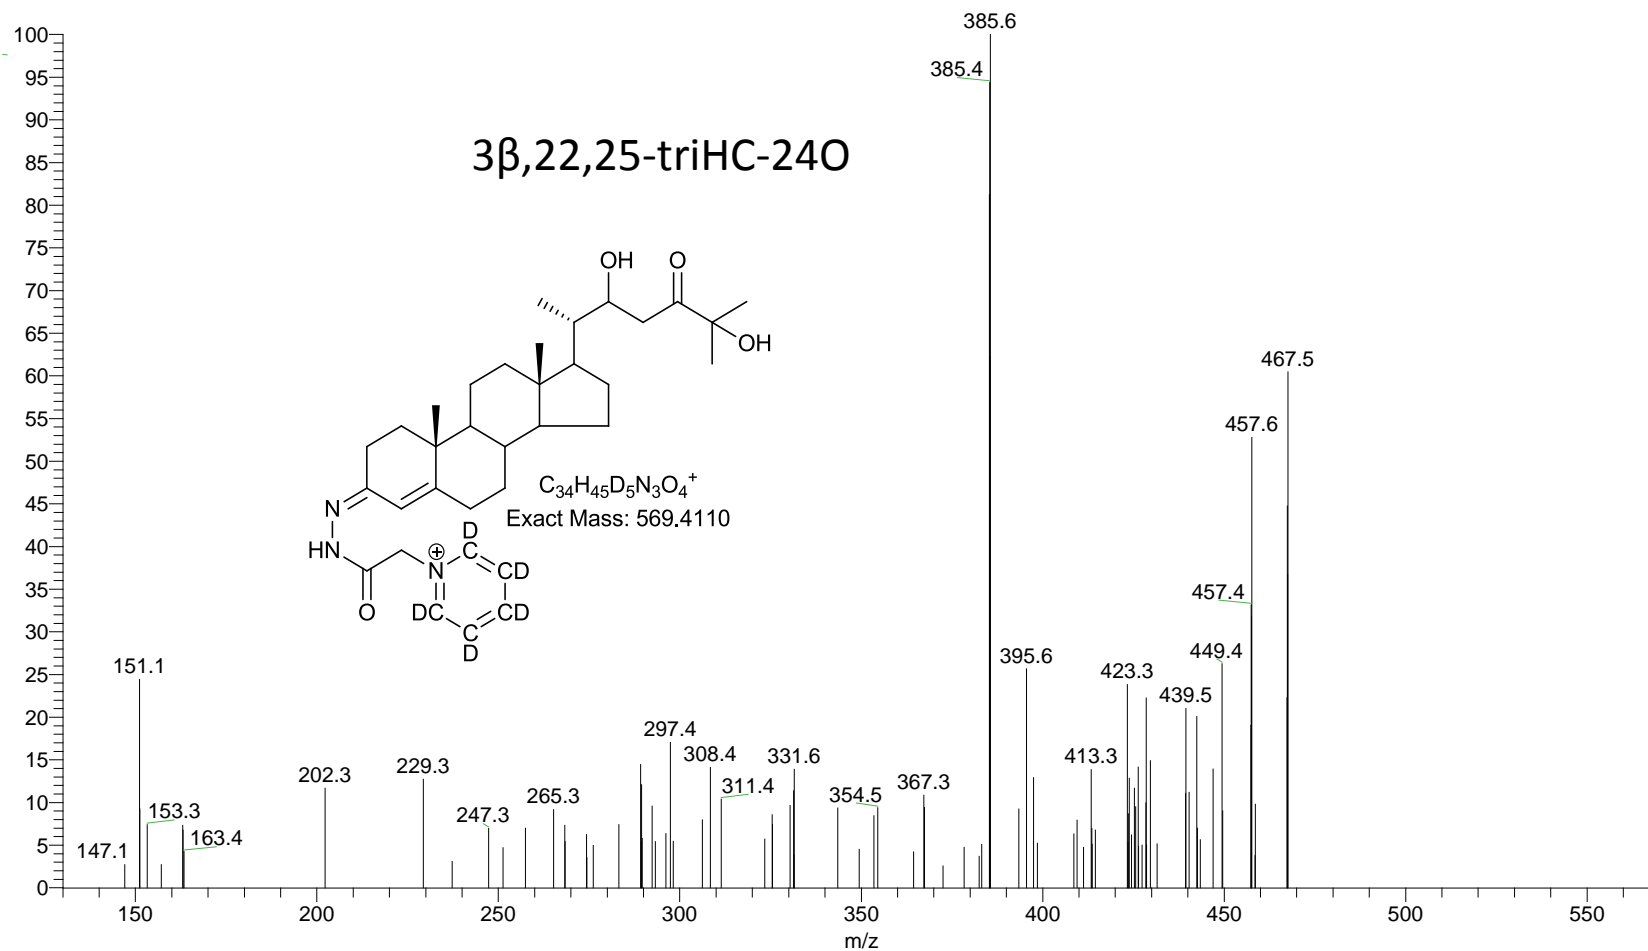

Figure S5

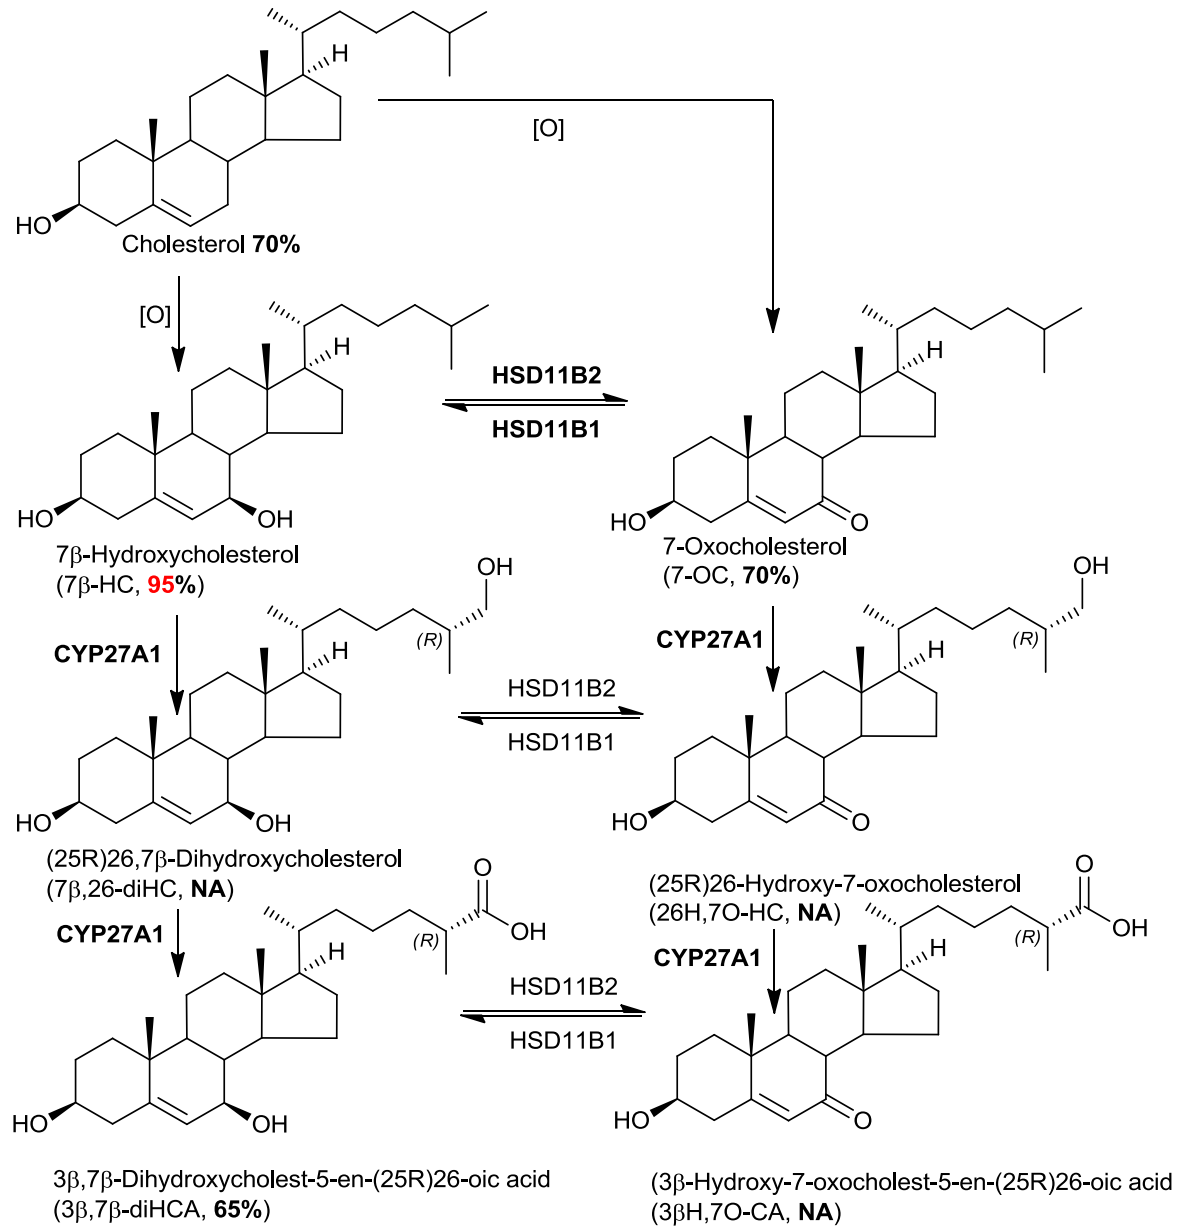

PC\_Plasma\_Bjorkem\_Mouse\_Fed-Chol-D6\_N...

12/02/13 13:20:38

PC\_Plasma\_Bjorkem\_Mouse\_Fed-Chol-D6\_No-24OHC-D7\_Fr1a-GPd5  
 F: ITMS + c ESI Full ms3 585.41@cid30.00 501.33@cid35.00 [135.00-5]

7 RT: 1.68 AV: 1 NL: 1.23E2

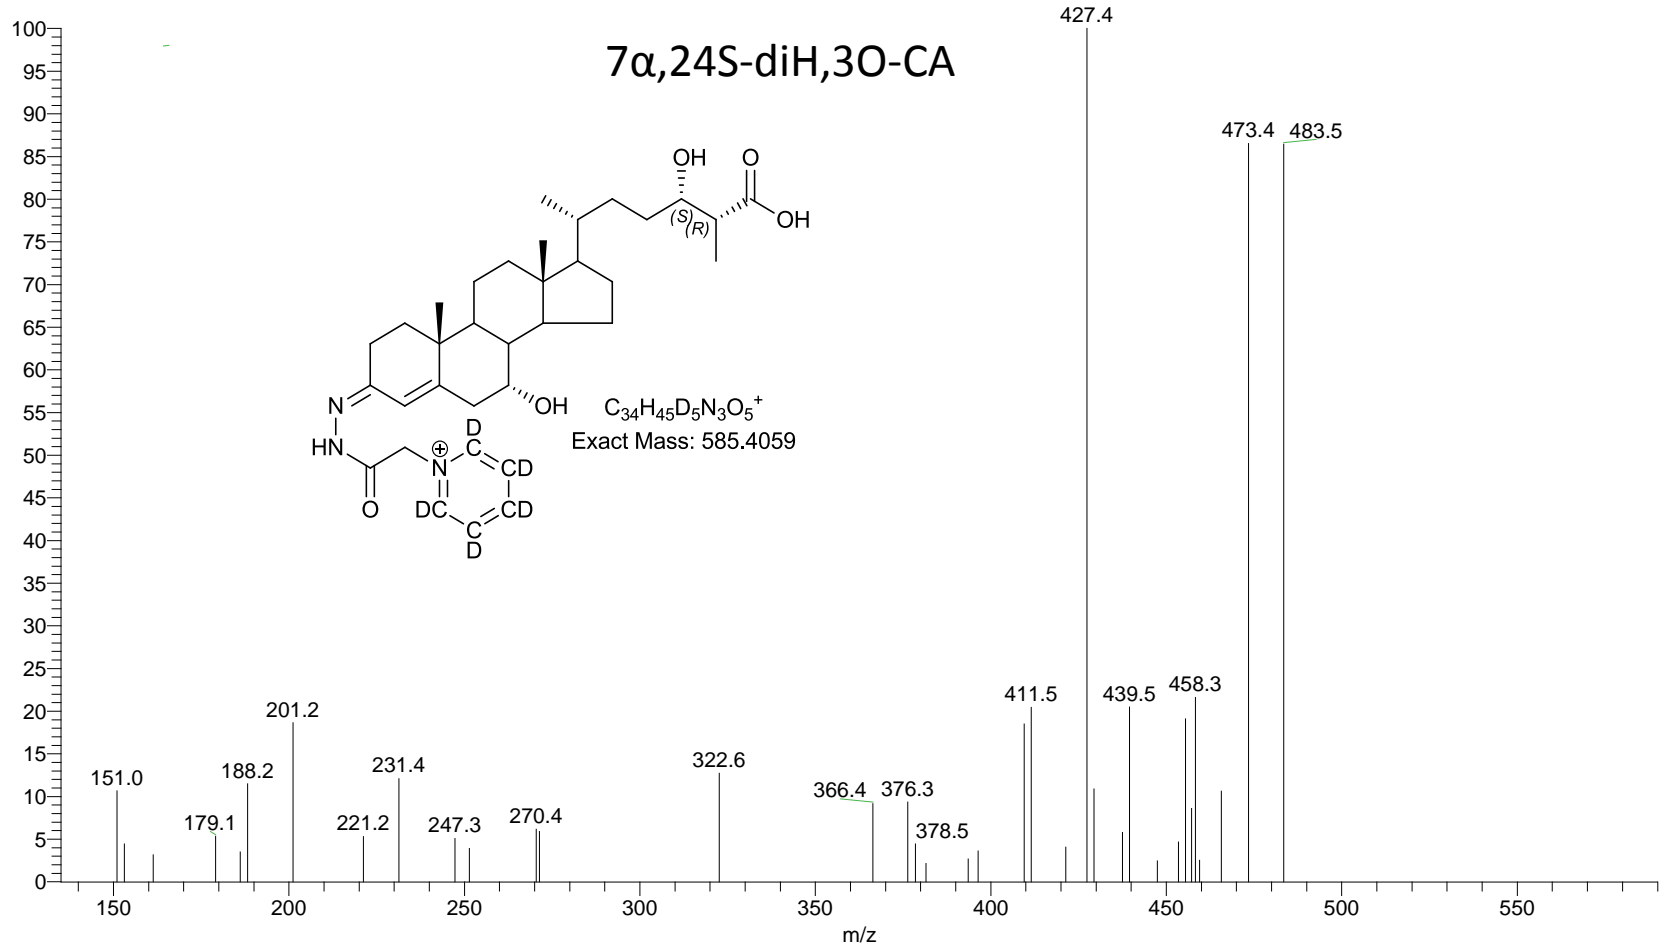

PC\_Plasma\_Bjorkem\_Mouse\_Fed-Chol-D6\_N...

12/02/13 13:20:38

PC\_Plasma\_Bjorkem\_Mouse\_Fed-Chol-I  
F: ITMS + c ESI Full ms3 585.41 @cid30.(f5\_fr1b-GPd0\_131202\_06 #453-468 RT: 2.13-2.20 AV: 6 NL: 1.78E1  
-590.00]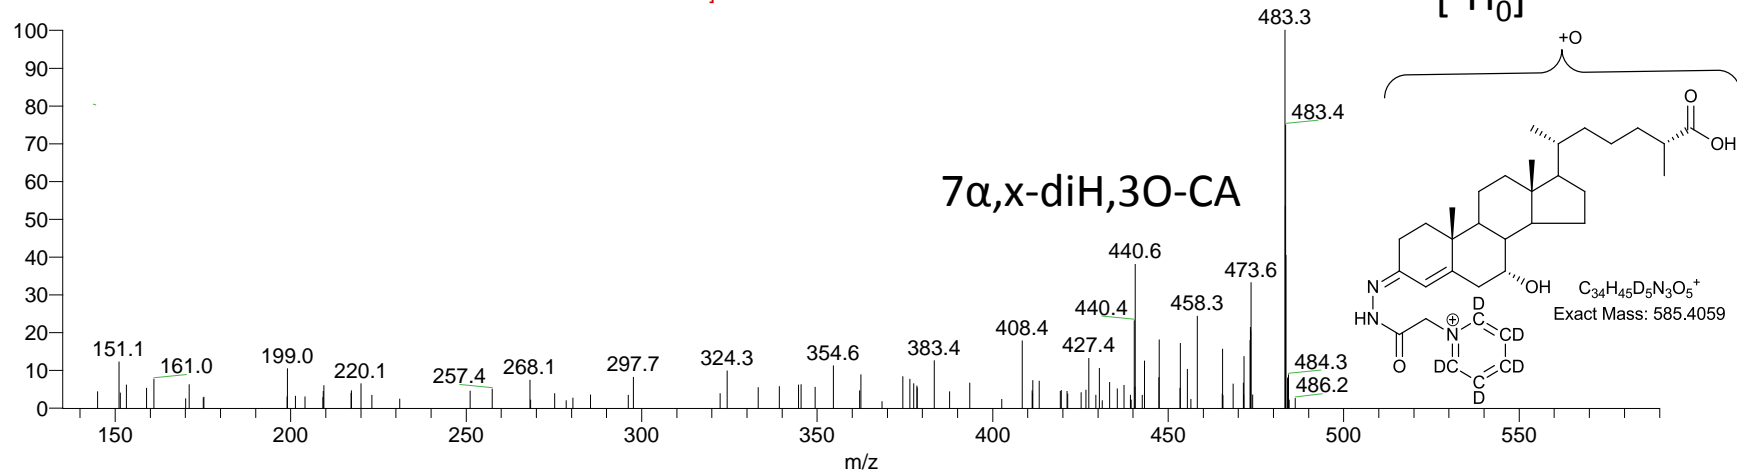PC\_Plasma\_Bjorkem\_Mouse\_Fed-Chol-D6\_No-24OHC-D7\_Fr1a-GPd5\_fr1b-GPd0\_131202\_18 #437-467 RT: 2.06-2.20 AV: 10 NL: 6.75  
F: ITMS + c ESI Full ms3 588.42 @cid30.00 504.35 @cid35.00 [135.00-590.00]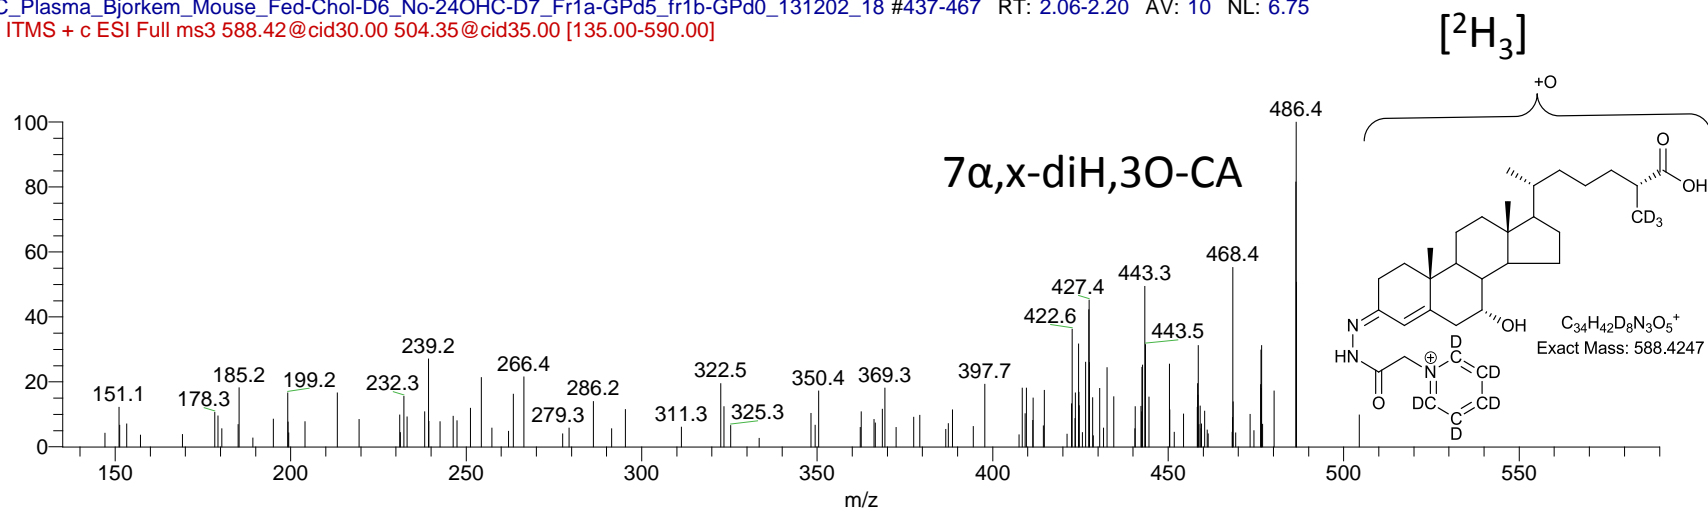

PC\_Plasma\_Bjorkem\_Mouse\_Fed-Chol-D6\_N...

12/02/13 13:20:38

PC\_Plasma\_Bjorkem\_Mouse\_Fed-Chol-D6\_  
F: ITMS + c ESI Full ms3 585.41 @cid30.00 :fr1b-GPd0\_131202\_06 #733-758 RT: 3.49-3.60 AV: 8 NL: 2.19E1  
[0.00]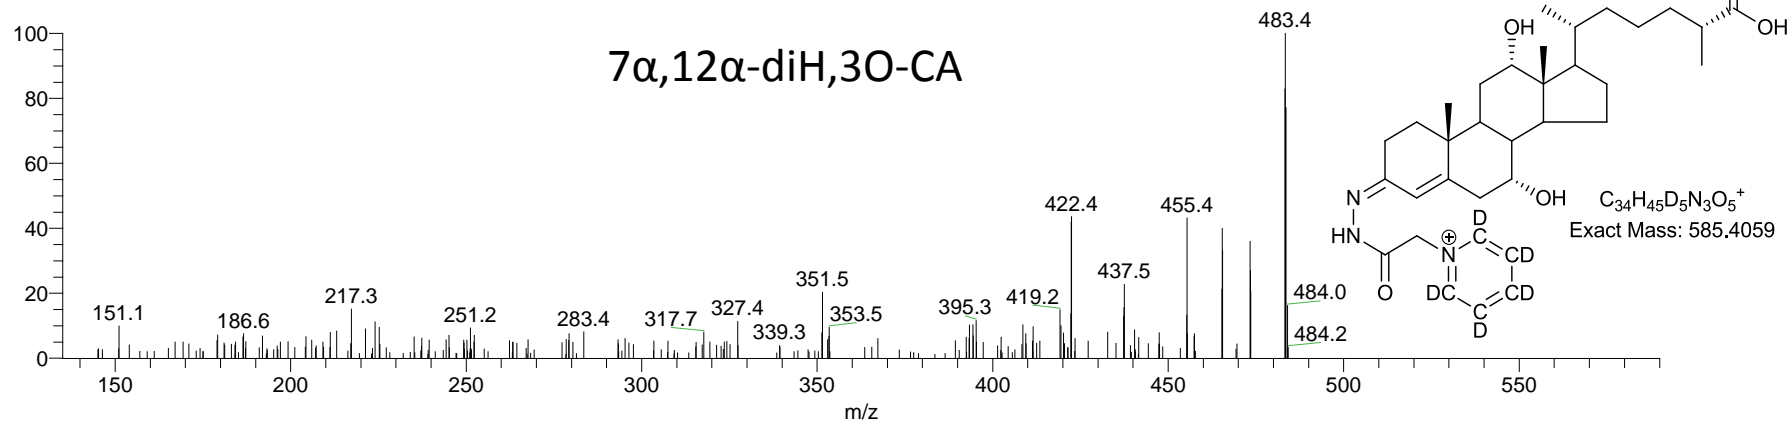pc\_plasma\_bjorkem\_mouse\_fed-chole-d6\_no-24ohc-d7\_fr1a-gpd5\_fr1b-gpd0\_131202\_18 #732 RT: 3.50 AV: 1 NL: 4.81E2  
F: ITMS + c ESI Full ms3 588.42 @cid30.00 504.35 @cid35.00 [135.00-590.00]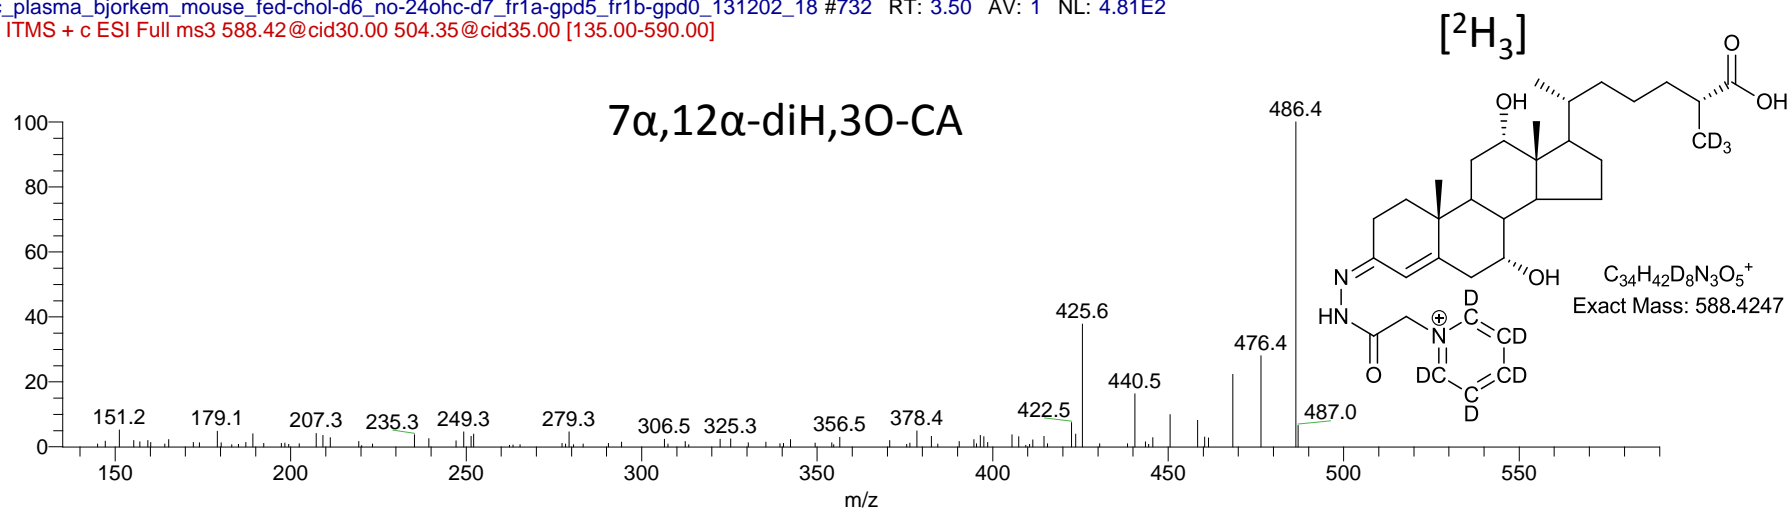

PC\_Plasma\_Bjorkem\_Mouse\_Fed-Chol-D6\_N...

12/02/13 13:20:38

PC\_Plasma\_Bjorkem\_Mouse\_Fed-Chol-I  
F: ITMS + c ESI Full ms3 585.41 @cid30.(

f5\_fr1b-GPd0\_131202\_06 #810-832 RT: 3.88-3.99 AV: 8 NL: 3.42  
-590.00]

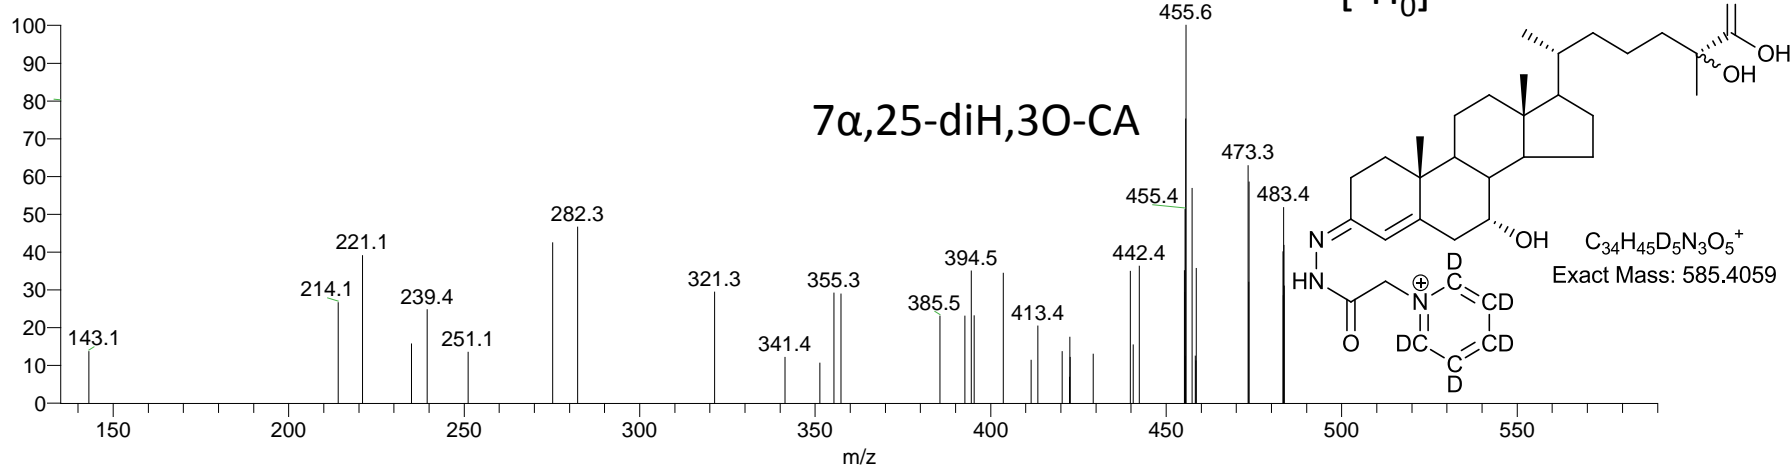

PC\_Plasma\_Bjorkem\_Mouse\_Fed-Chol-D6\_No-24OHC-D7\_Fr1a-GPd5\_fr1b-GPd0\_131202\_18 #766-804 RT: 3.68-3.87 AV: 13 NL: 4.12  
F: ITMS + c ESI Full ms3 588.42 @cid30.00 504.35 @cid35.00 [135.00-590.00]

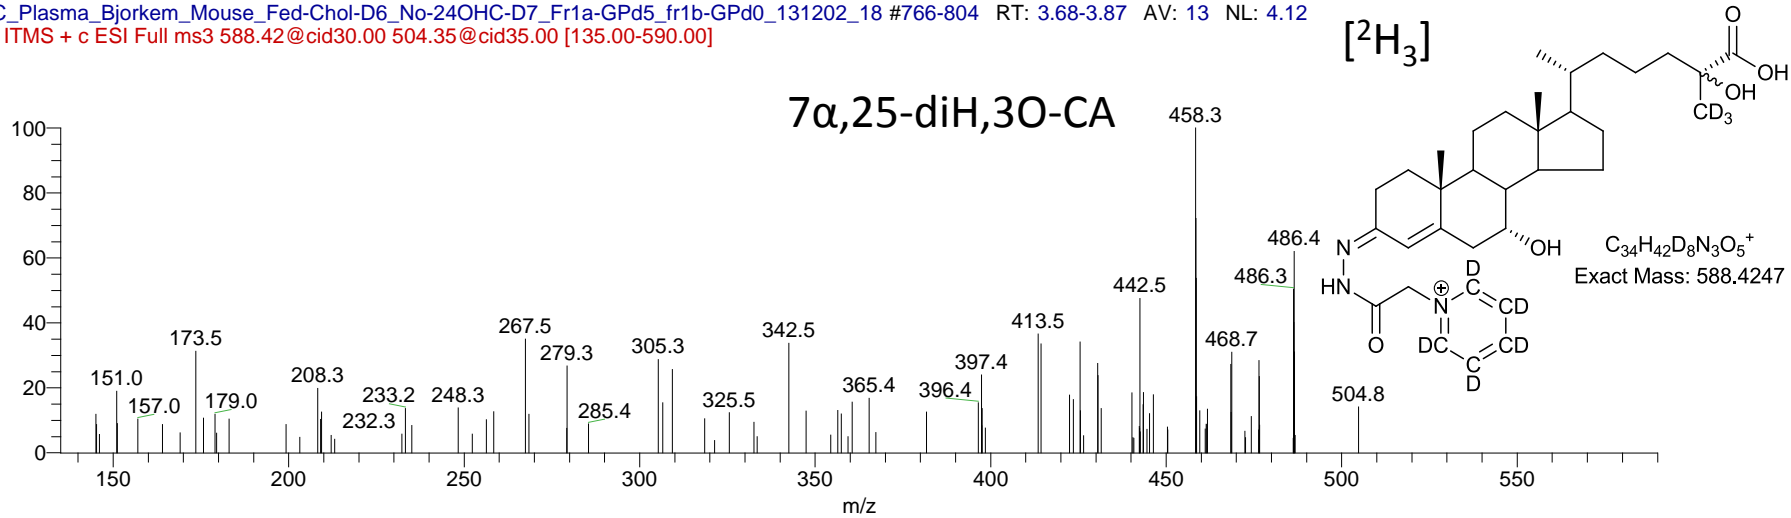

Figure S7

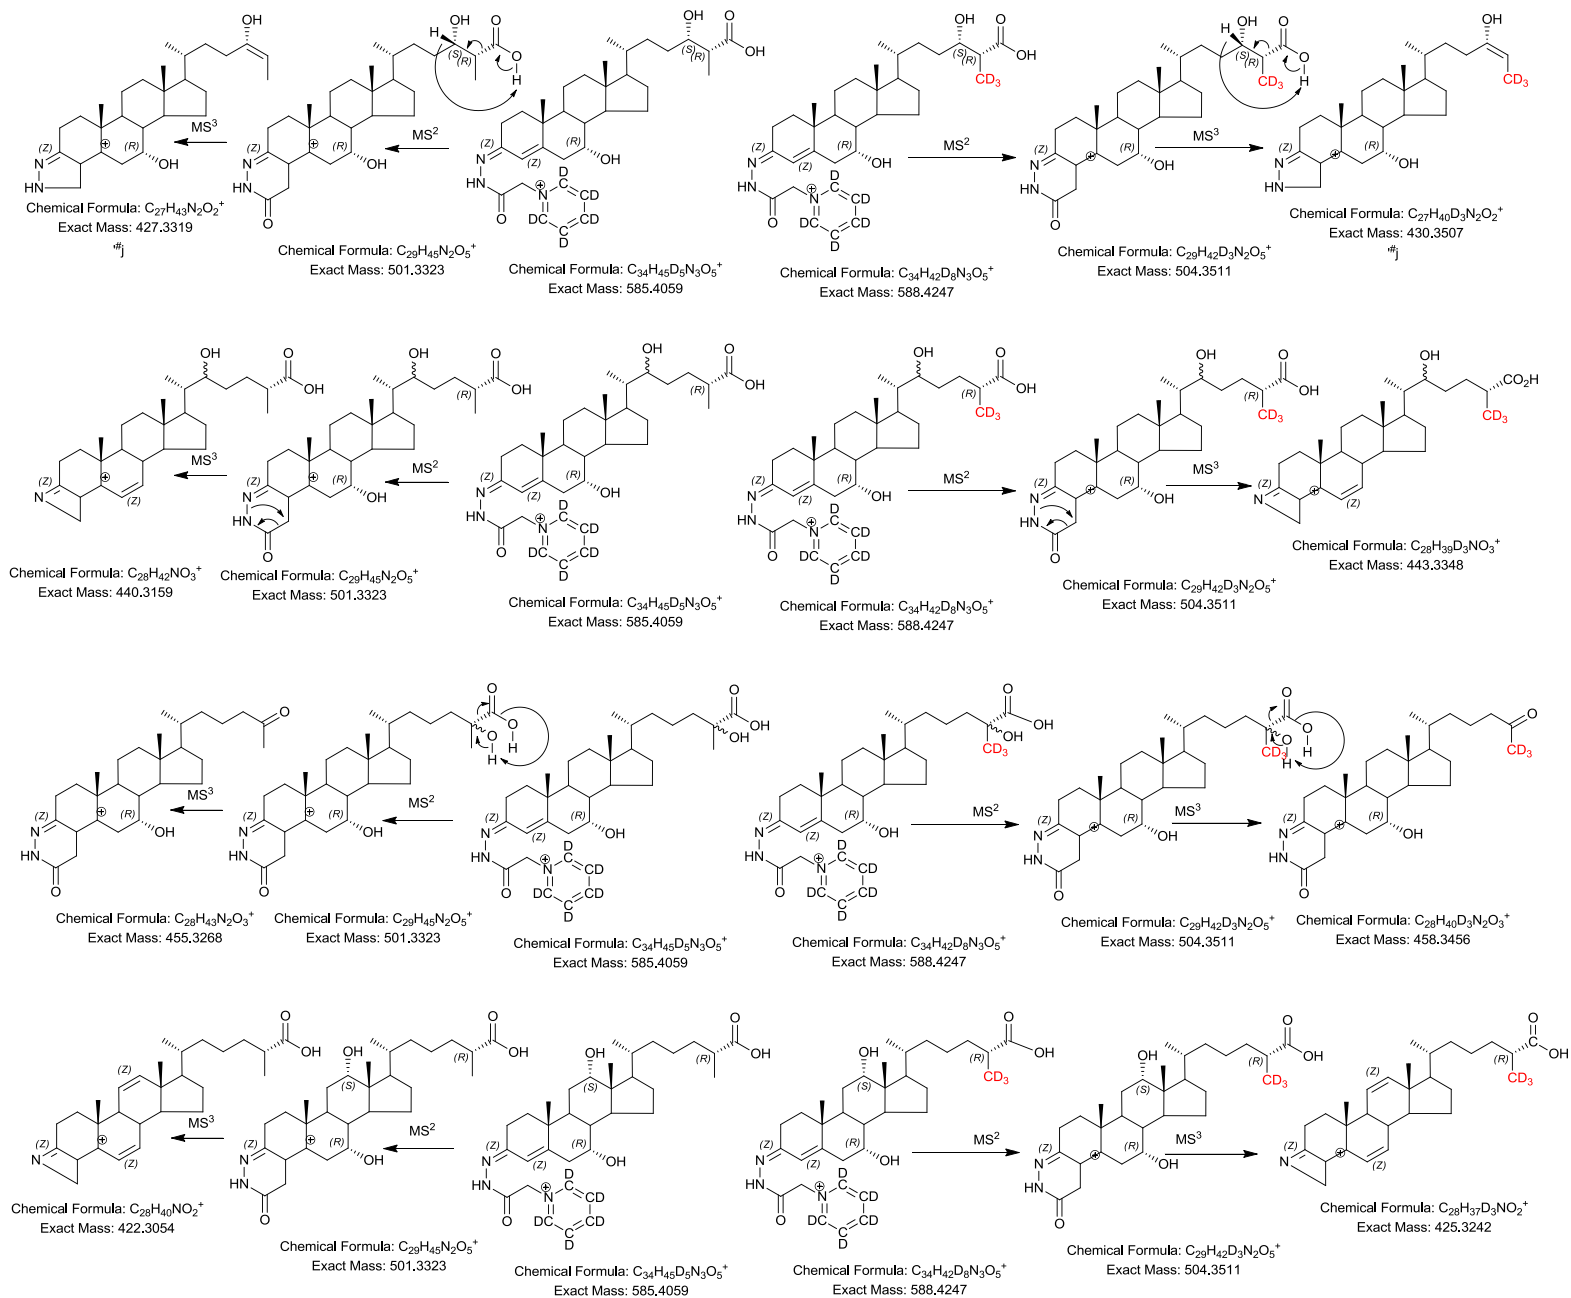



PC\_Plasma\_Mouse\_Bjorkem\_CYP46(16)\_no-...

11/08/13 22:12:09

PC\_Plasma\_Mouse\_Bjorkem\_CYP46(16)\_n  
F: ITMS + c ESI Full ms3 585.41 @cid30.00 :

b-GPd0\_131108\_06 #315 RT: 1.65 AV: 1 NL: 9.83E2  
[0.00]

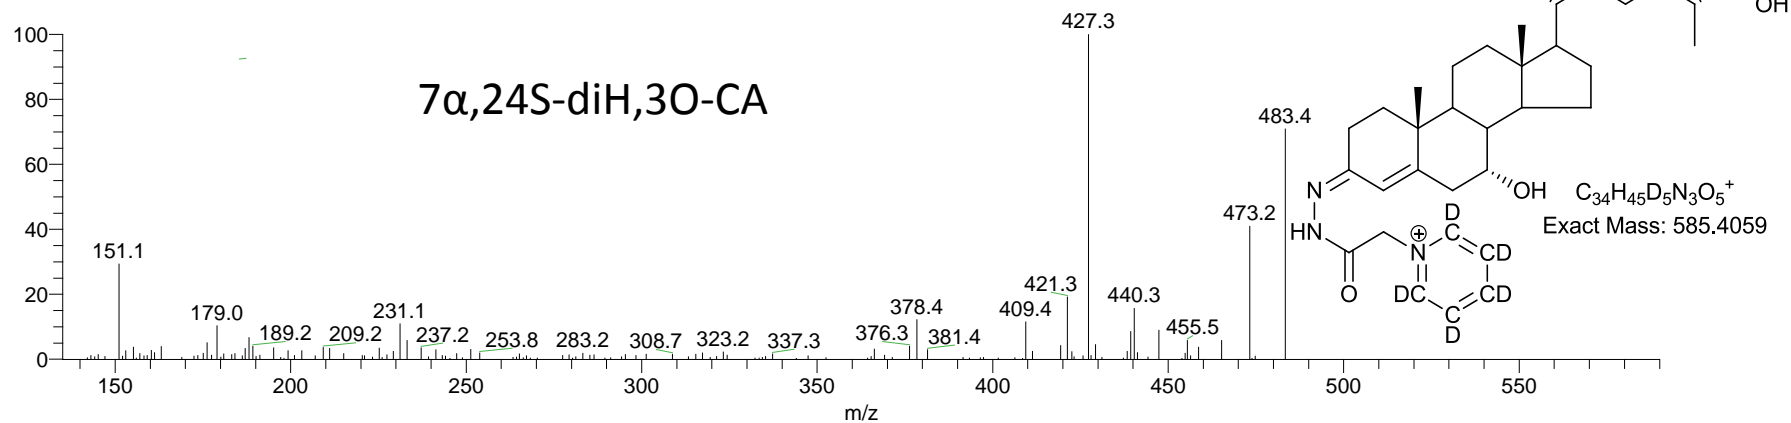

PC\_Plasma\_Mouse\_Bjorkem\_CYP46(16)\_no-hydrolysis\_Fr1a-GPd5\_Fr1b-GPd0\_131108\_06 #432 RT: 2.29 AV: 1 NL: 4.46E2  
F: ITMS + c ESI Full ms3 585.41 @cid30.00 501.33 @cid35.00 [135.00-590.00]

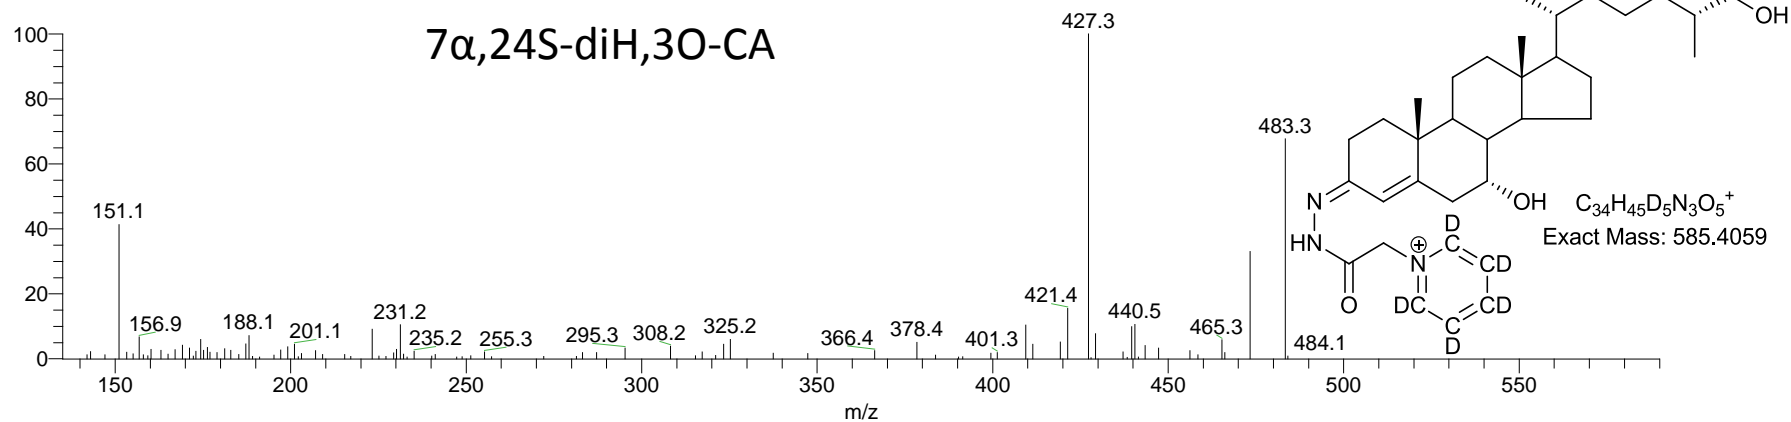

PC\_Plasma\_Mouse\_Bjorkem\_CYP46(16)\_no-...

11/08/13 22:12:09

PC\_Plasma\_Mouse\_Bjorkem\_CYP46(16)\_no-hydrolysis\_Fr1a-GPd5\_  
F: ITMS + c ESI Full ms3 585.41@cid30.00 501.33@cid35.00 [135.00]

5-708 RT: 3.68-3.87 AV: 11 NL: 8.65

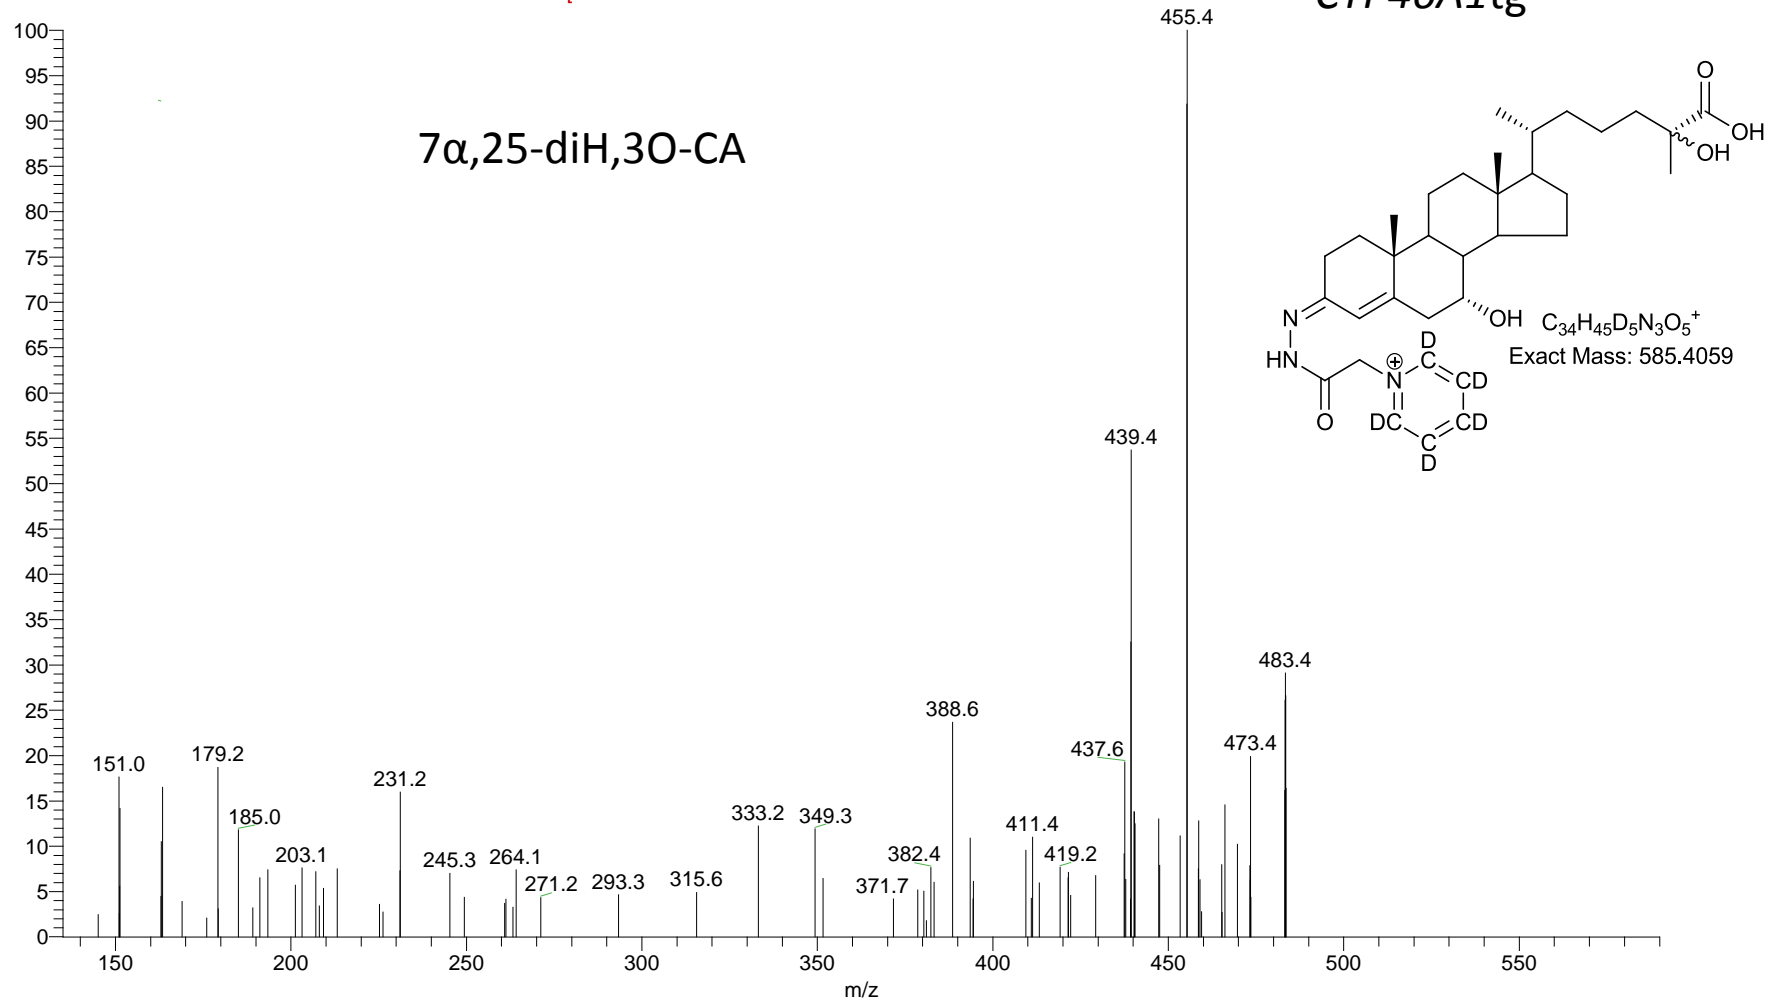

pc\_plasma\_mouse\_jax\_control-101045-2\_...

11/09/13 10:38:29

pc\_plasma\_mouse\_jax\_control-101045-2\_fr1a-gpd5\_fr1b-gpd0\_1311  
F: ITMS + c ESI Full ms3 585.41@cid30.00 501.33@cid35.00 [135.00]

1.54 AV: 8 NL: 1.79E1

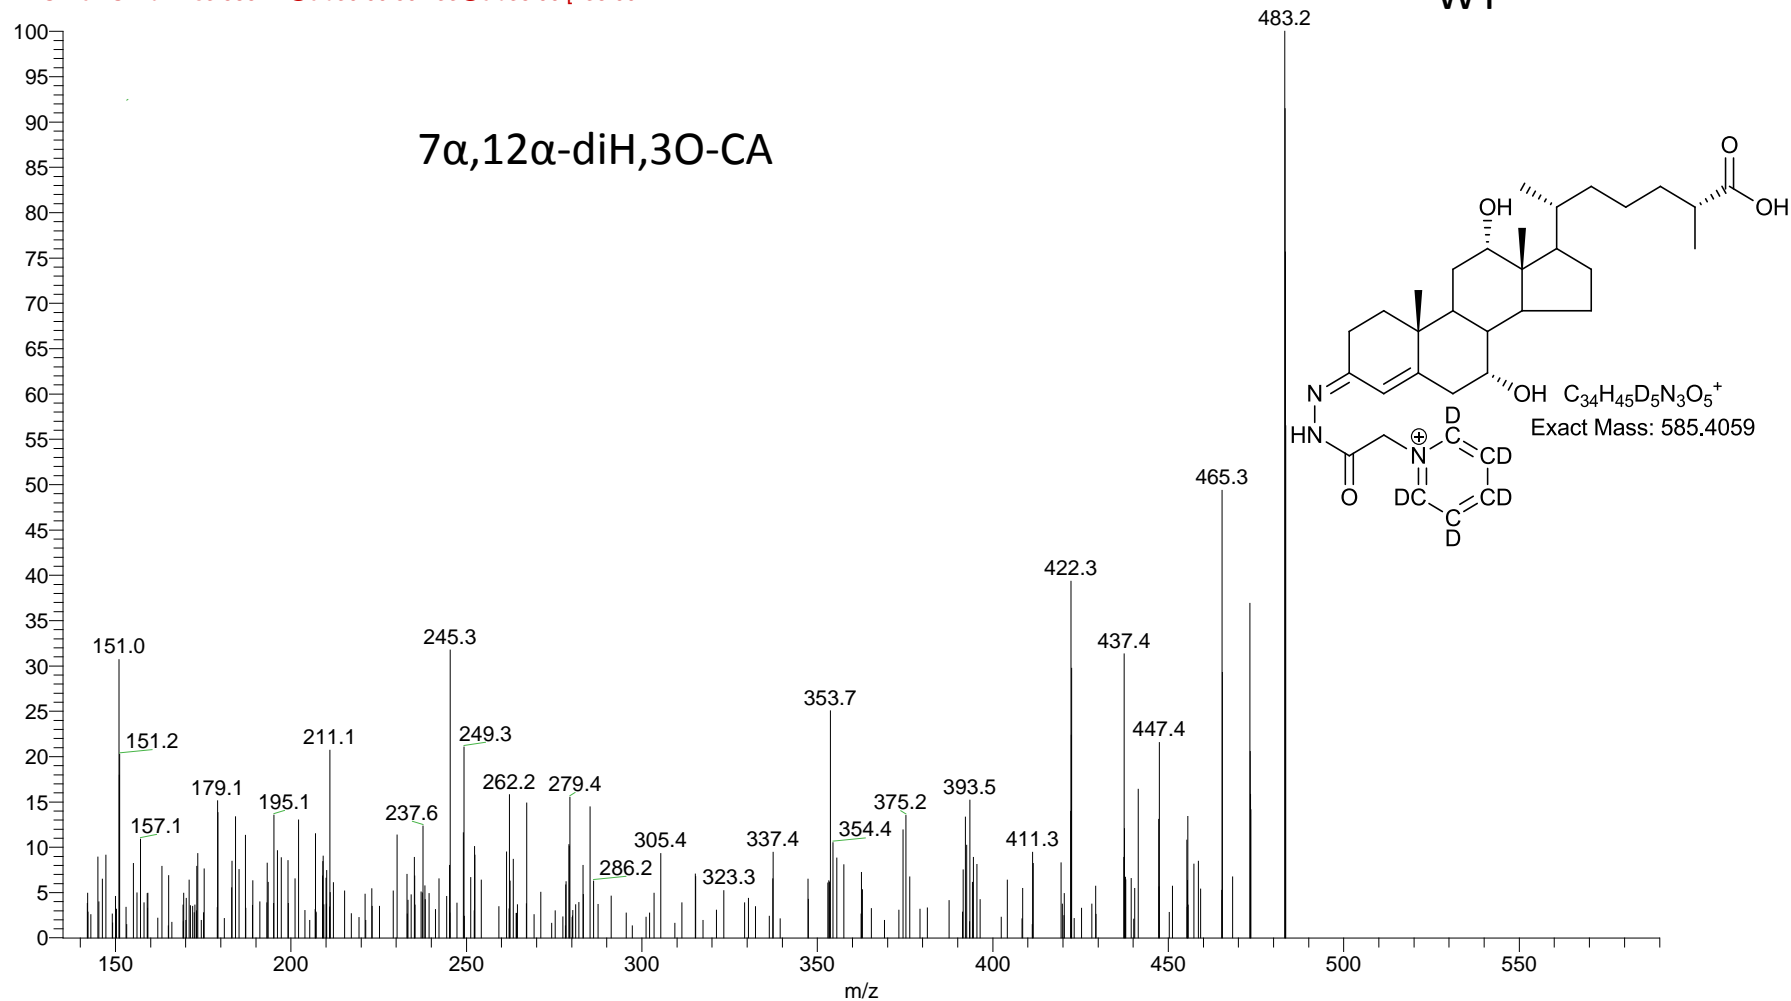

PC\_Plasma\_Mouse\_Bjorkem\_CYP46(16)\_no-...

11/08/13 20:49:13

PC\_Plasma\_Mouse\_Bjorkem\_CYP46(16)\_n  
F: ITMS + c ESI Full ms3 539.44@cid30.00b-GPd0\_131108\_02 #1338 RT: 7.50 AV: 1 NL: 5.33E3  
5.00]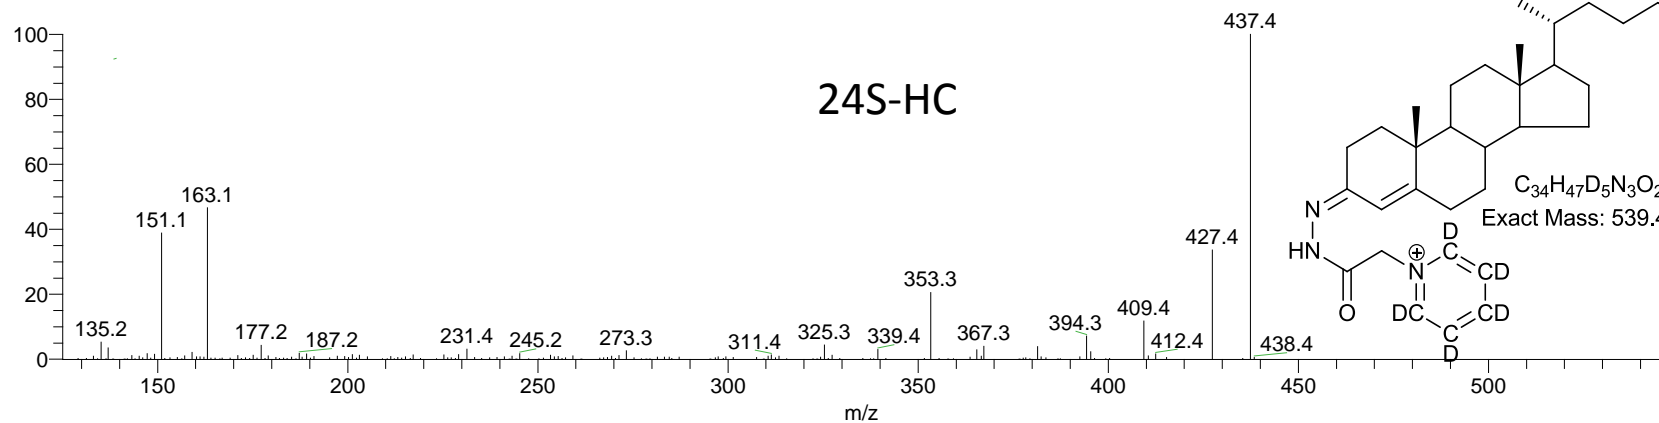pc\_plasma\_mouse\_jax\_control-101045-2\_fr1a-gpd5\_fr1b-gpd0\_131108\_02 #1335 RT: 7.49 AV: 1 NL: 6.39E2  
F: ITMS + c ESI Full ms3 539.44@cid30.00 455.36@cid35.00 [125.00-545.00]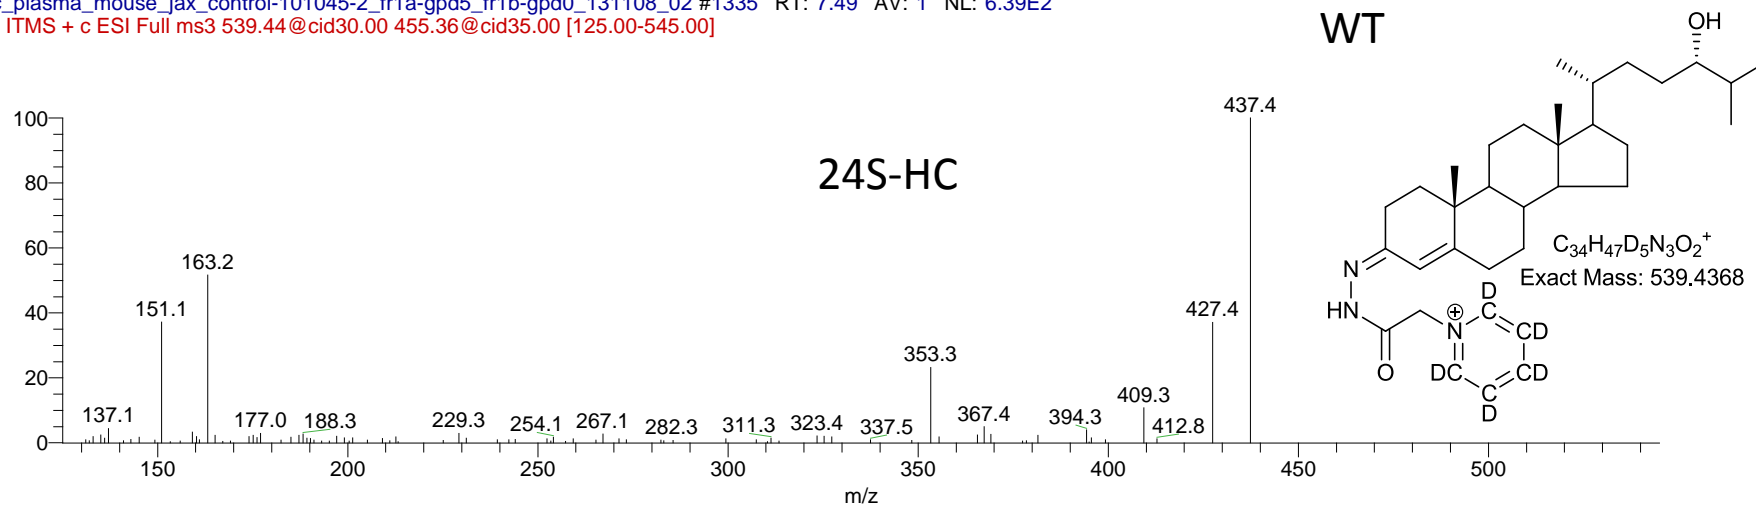

PC\_Plasma\_Mouse\_Bjorkem\_CYP46(16)\_no-...

11/08/13 20:28:29

PC\_Plasma\_Mouse\_Bjorkem\_CYP46(16)\_no-hydrolysis\_Fr1a-GPd5\_Fr  
F: ITMS + c ESI Full ms3 537.42@cid30.00 453.35@cid35.00 [120.00-5.

RT: 7.01 AV: 1 NL: 9.47E1

CYP46A1tg

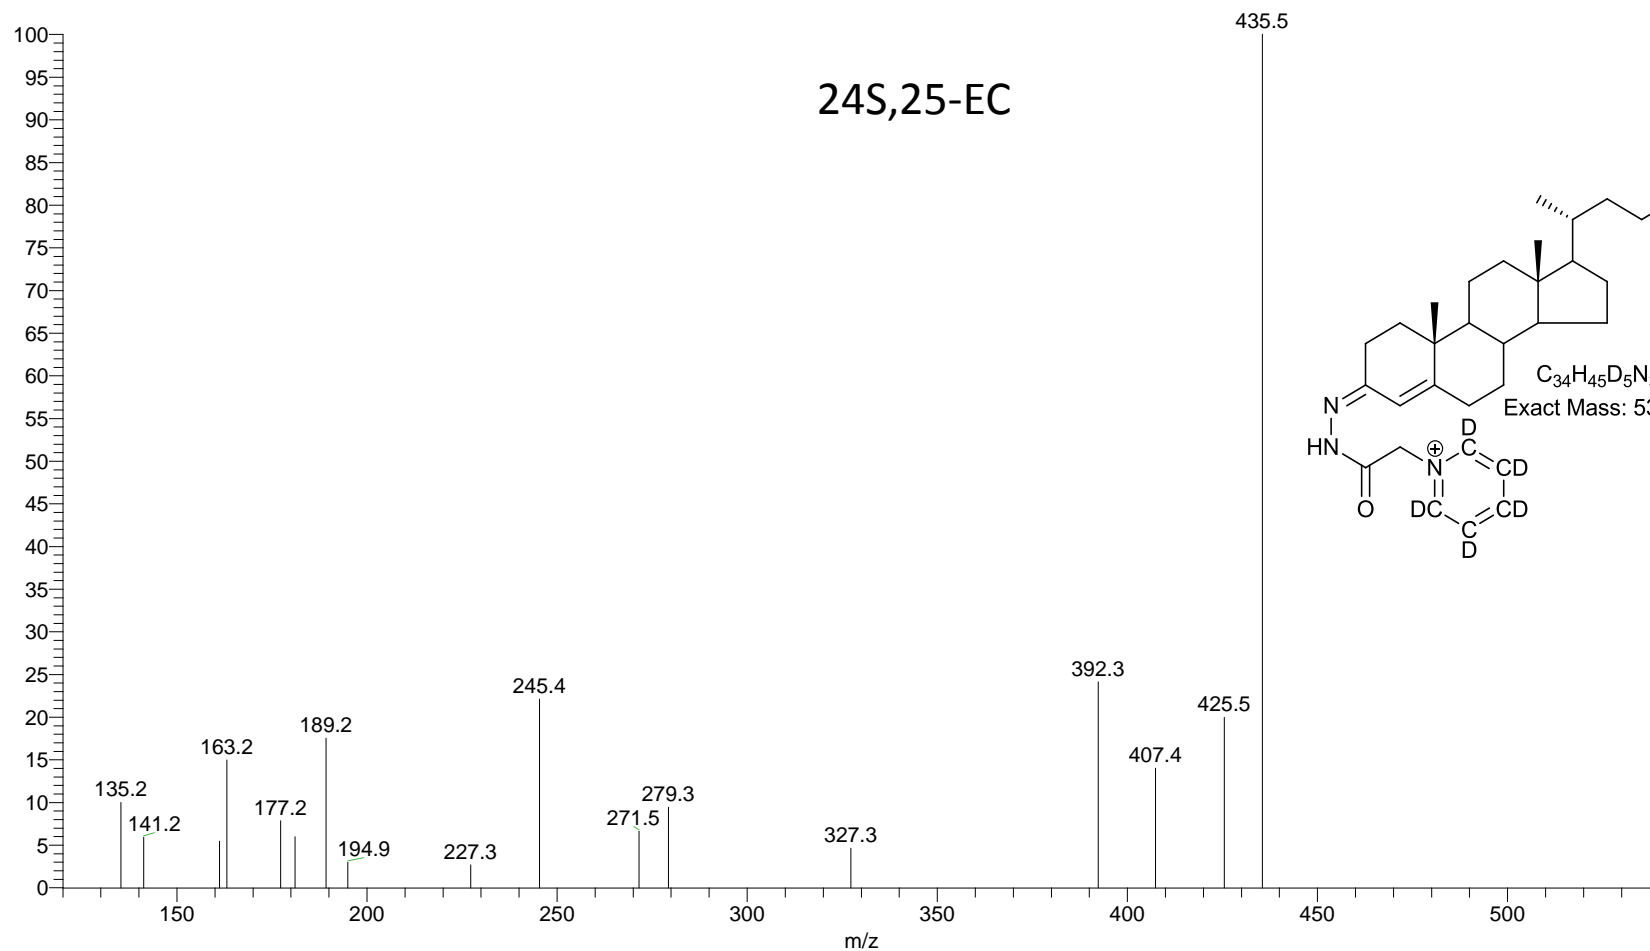

PC\_Plasma\_Mouse\_Bjorkem\_CYP46(16)\_no...

11/08/13 20:28:29

PC\_Plasma\_Mouse\_Bjorkem\_CYP46(16)\_no-hydrolysis\_Fr1a-GPd5\_Fr  
F: ITMS + c ESI Full ms3 537.42@cid30.00 453.35@cid35.00 [120.00-5

1365 RT: 7.62-7.65 AV: 3 NL: 2.43E1

CYP46A1tg

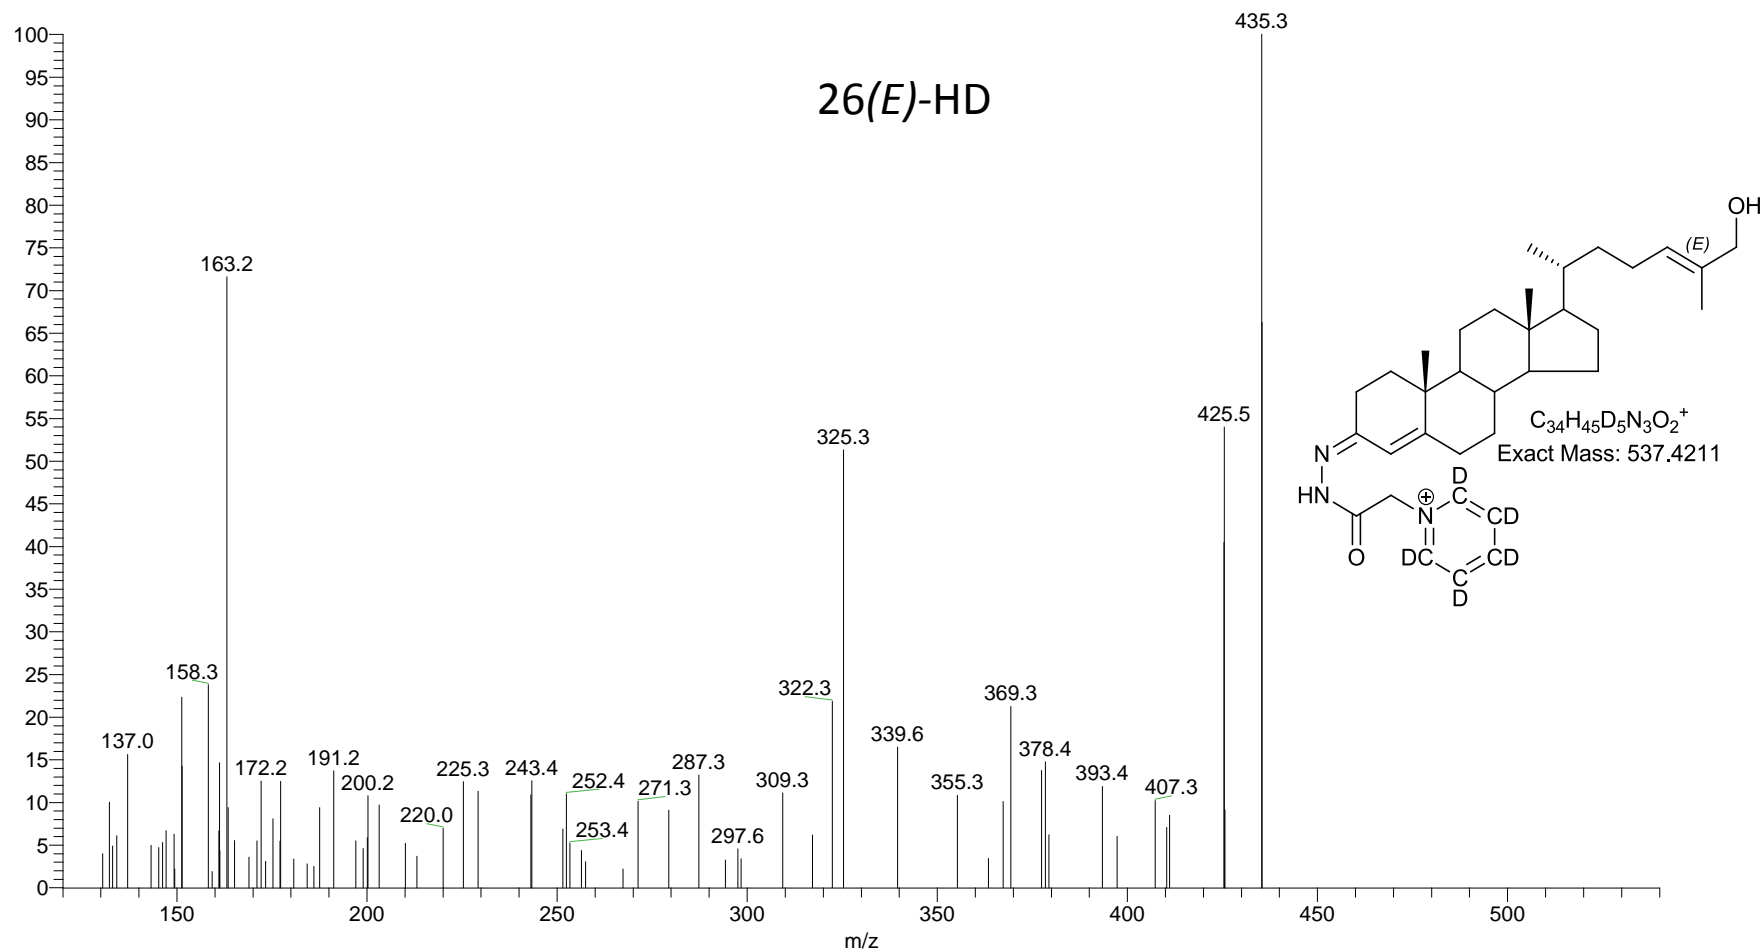

PC\_Plasma\_Mouse\_Bjorkem\_CYP46(16)\_no-...

11/08/13 20:28:29

PC\_Plasma\_Mouse\_Bjorkem\_CYP46(16)\_no-hydrolysis\_Fr1a-GPd5\_Fr  
F: ITMS + c ESI Full ms3 537.42@cid30.00 453.35@cid35.00 [120.00-5]

RT: 7.91 AV: 1 NL: 2.26E2

CYP46A1tg

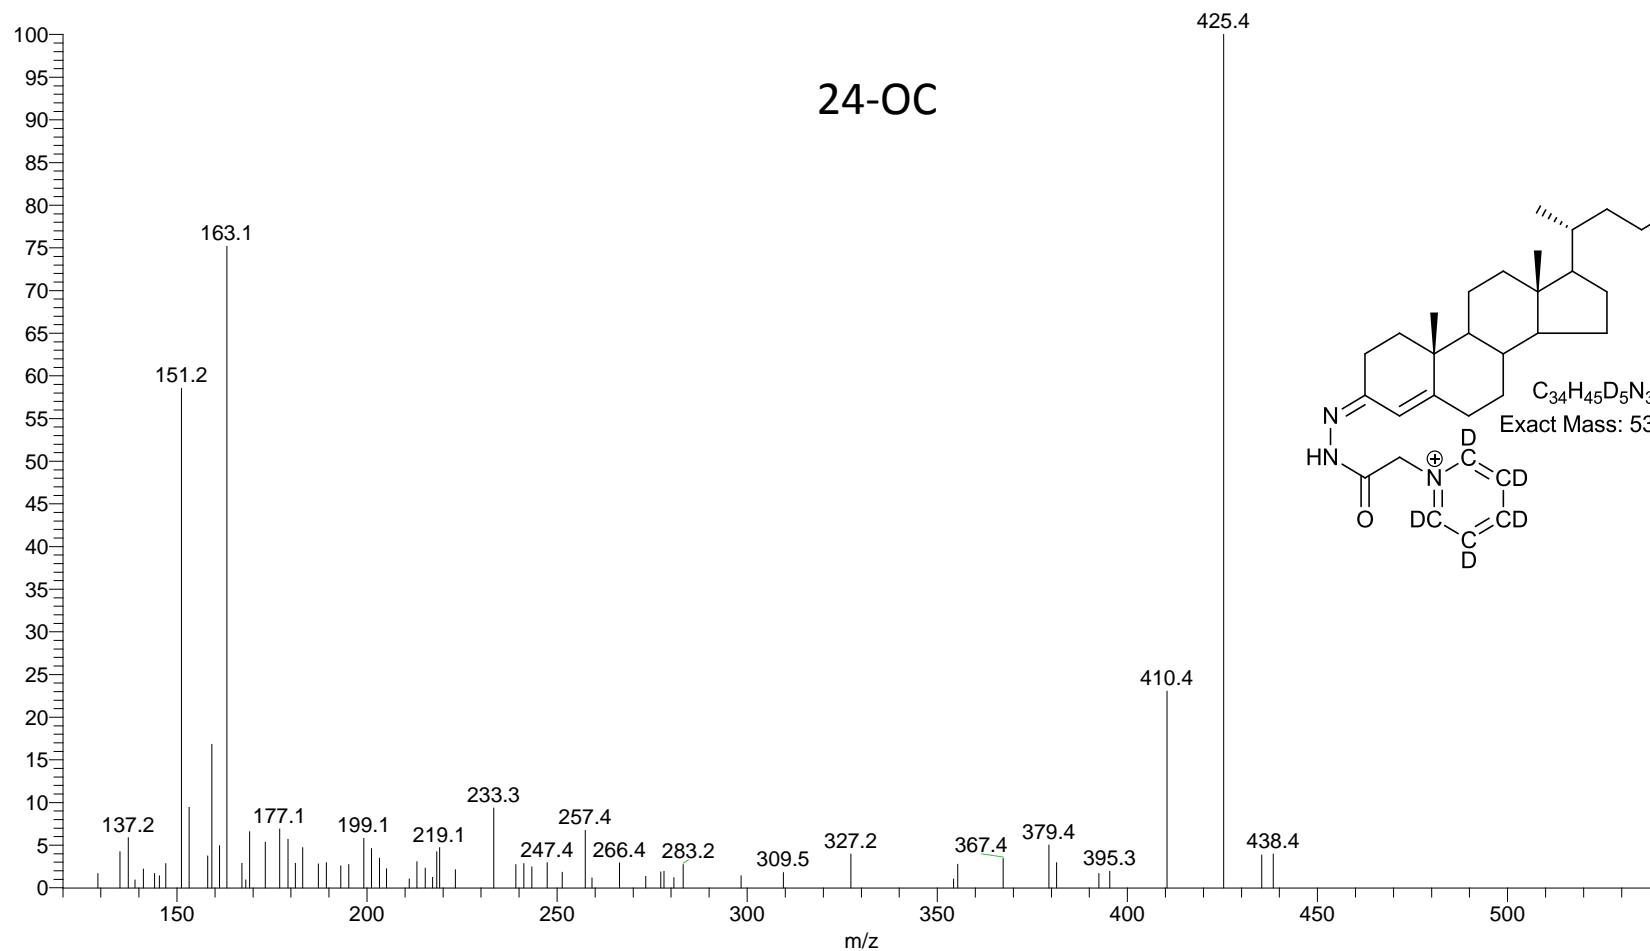

Figure S10

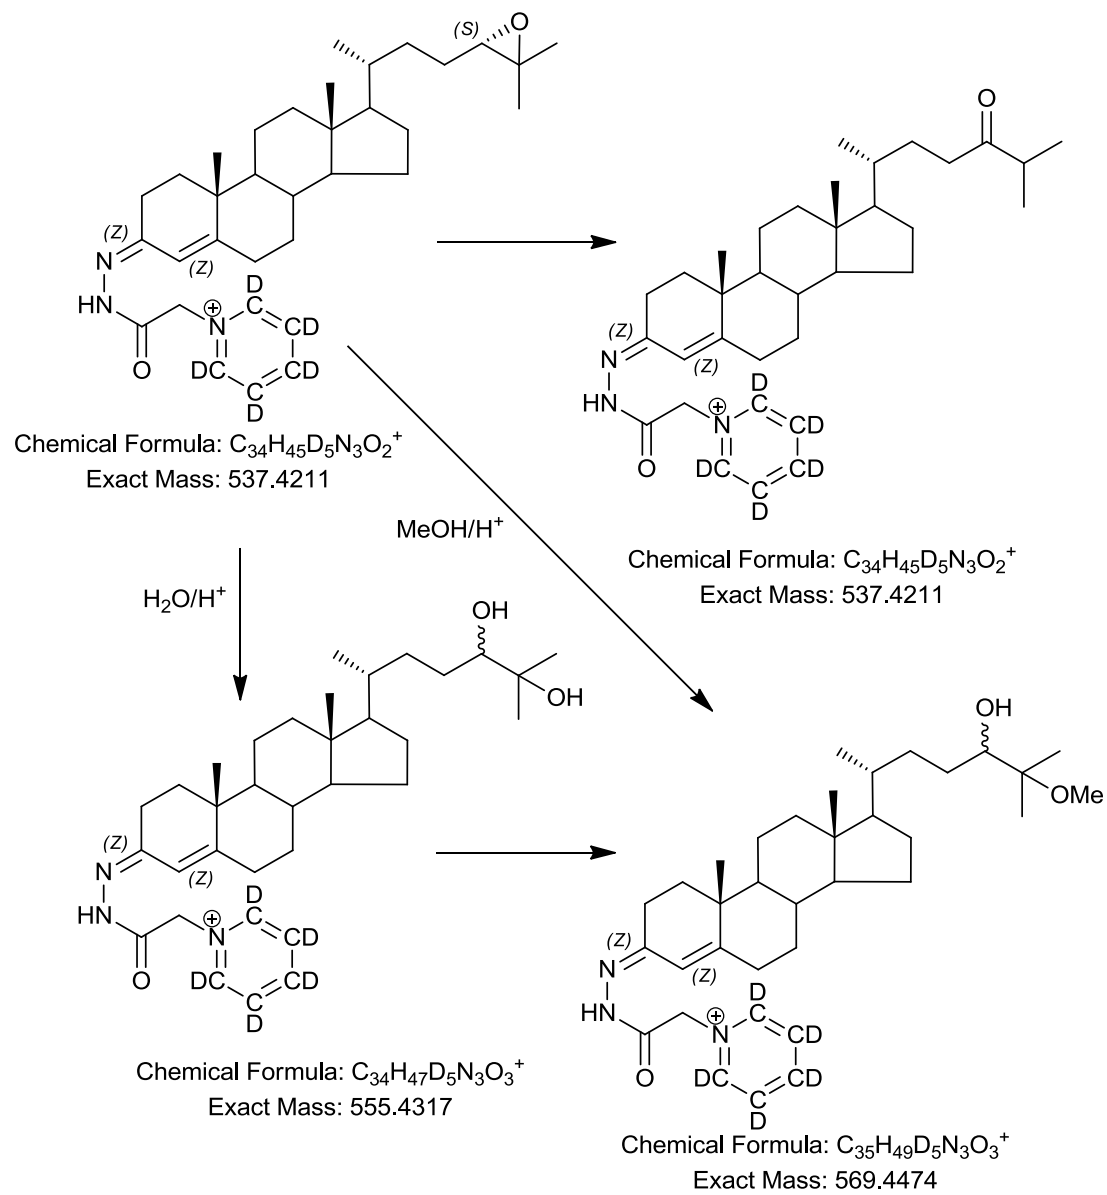



PC\_Plasma\_Mouse\_Bjorkem\_CYP46(16)\_no-...

11/08/13 21:30:41

PC\_Plasma\_Mouse\_Bjorkem\_CYP46(16)\_no-hydrolysis\_Fr1a-GPd5\_Fr  
F: ITMS + c ESI Full ms3 555.43@cid30.00 471.36@cid35.00 [125.00-5]

45 RT: 3.29-3.44 AV: 9 NL: 4.59E1

CYP46A1tg

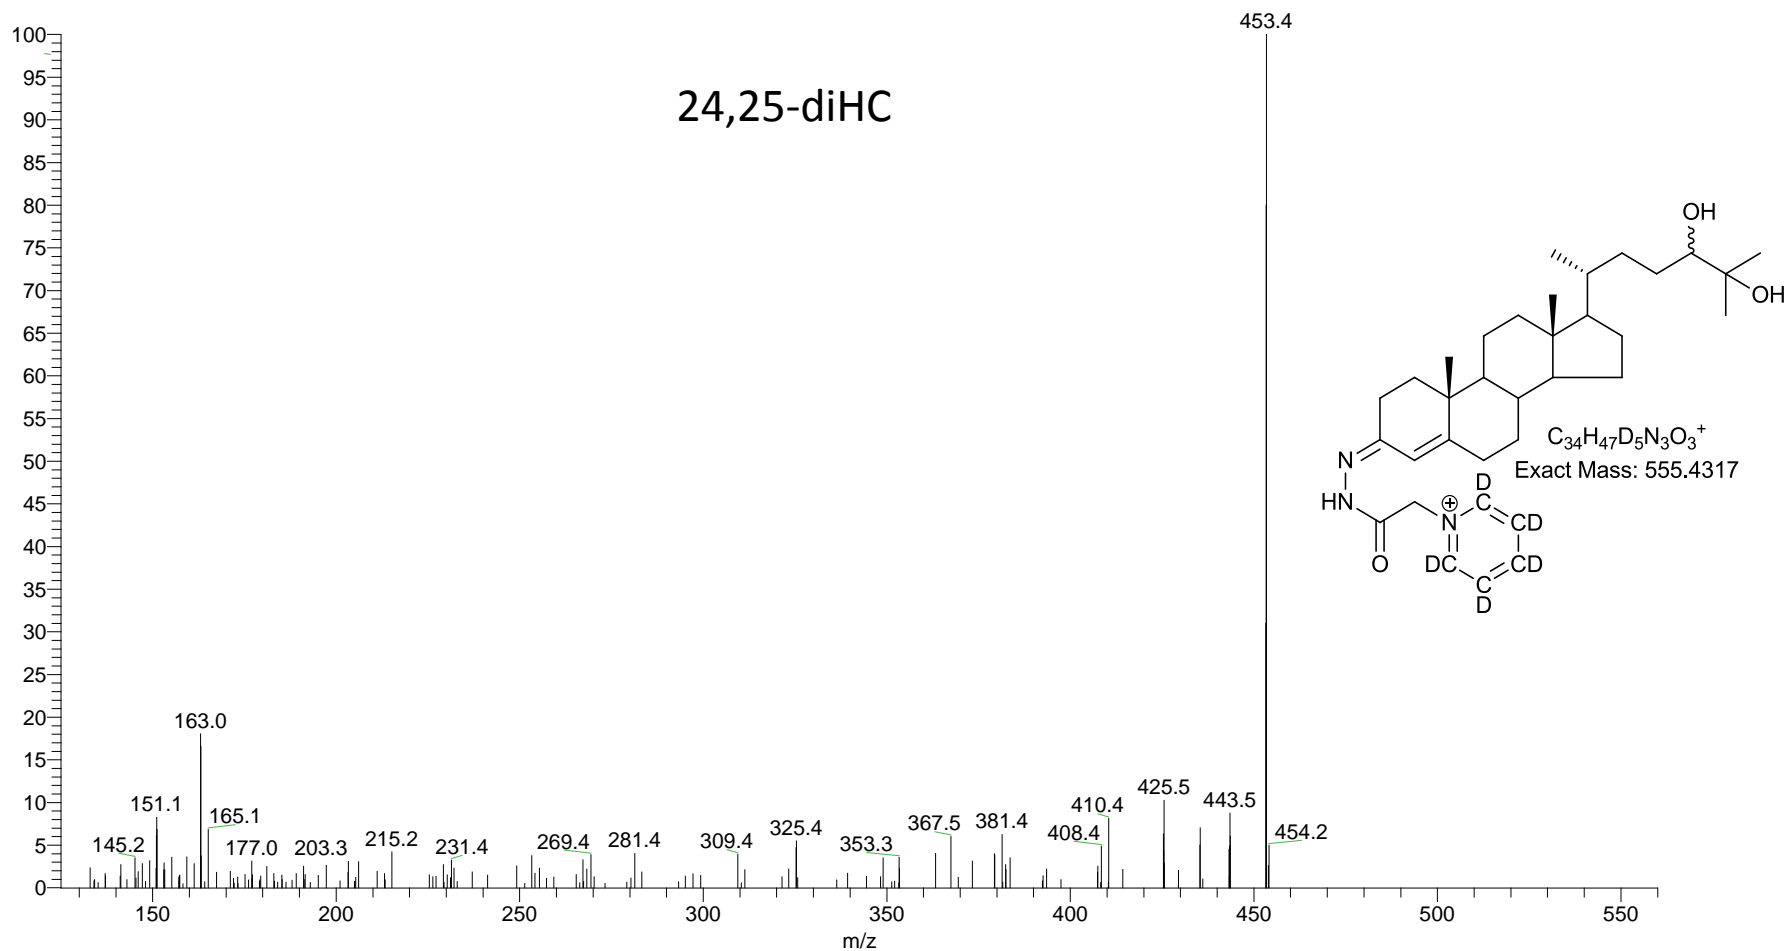

pc\_plasma\_mouse\_jax\_control-101045-2\_...

11/09/13 09:57:01

pc\_plasma\_mouse\_jax\_control-101045-2\_fr1a-gpd5\_fr1b-gpd0\_131108  
 F: ITMS + c ESI Full ms3 555.43@cid30.00 471.36@cid35.00 [125.00-56

I AV: 4 NL: 9.66

WT

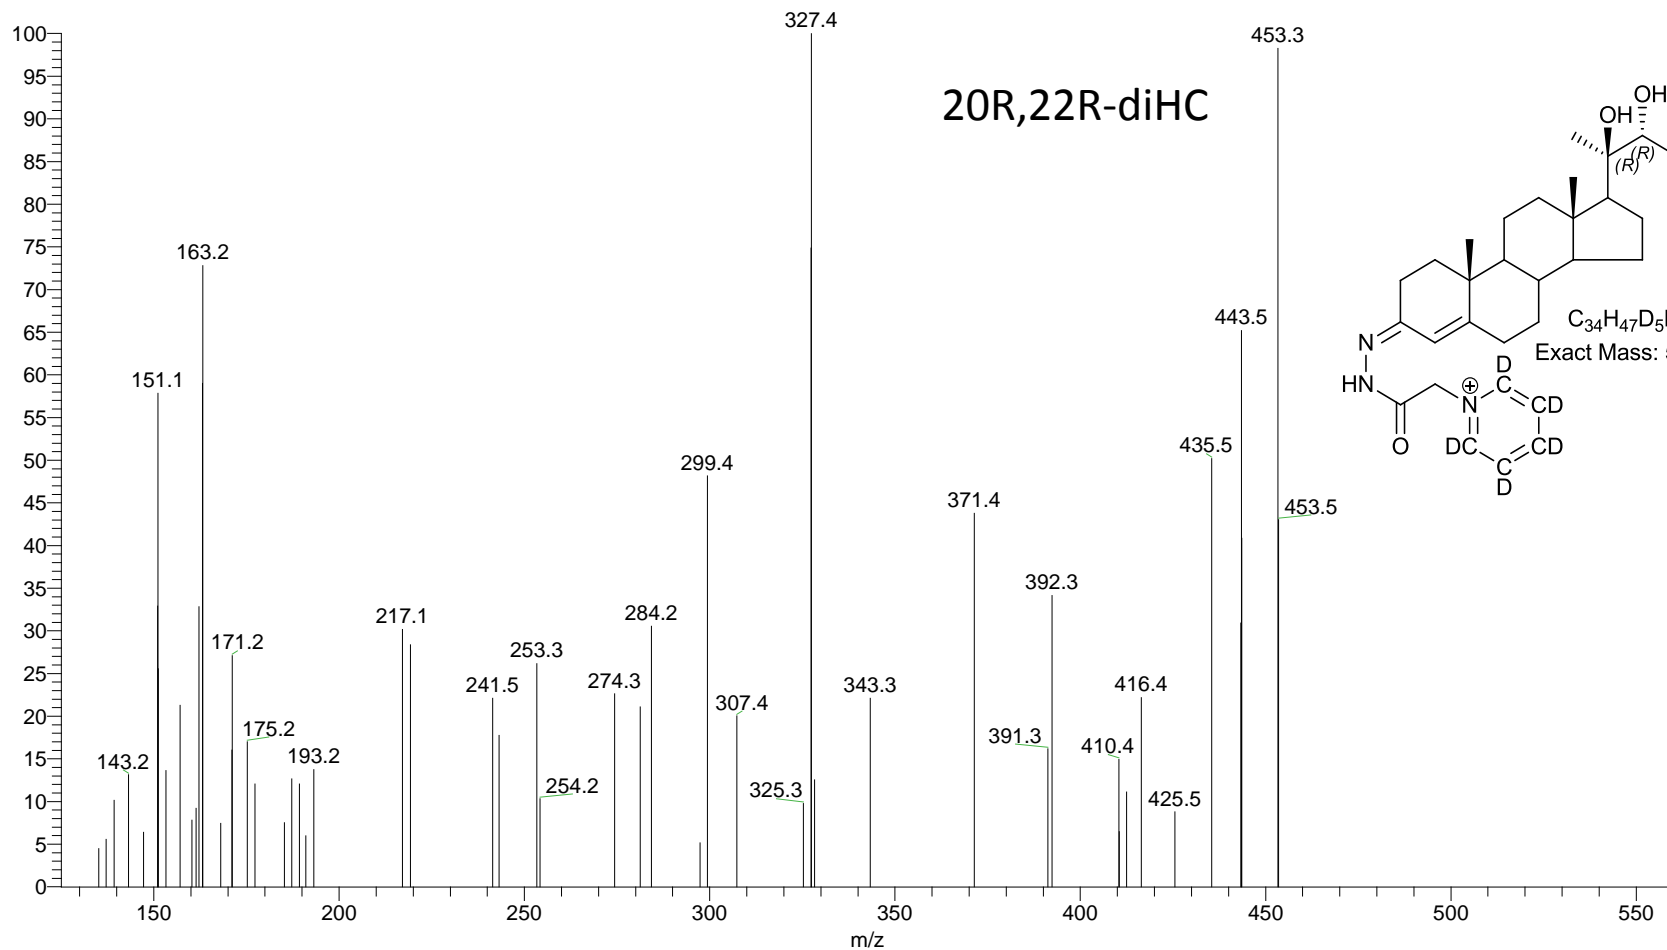

PC\_Plasma\_Mouse\_Bjorkem\_CYP46(16)\_no-...

11/08/13 21:30:41

PC\_Plasma\_Mouse\_Bjorkem\_CYP46(16)\_n  
F: ITMS + c ESI Full ms3 555.43@cid30.00

b-GPd0\_131108\_04 #948 RT: 5.32 AV: 1 NL: 3.98E2  
[0.00]

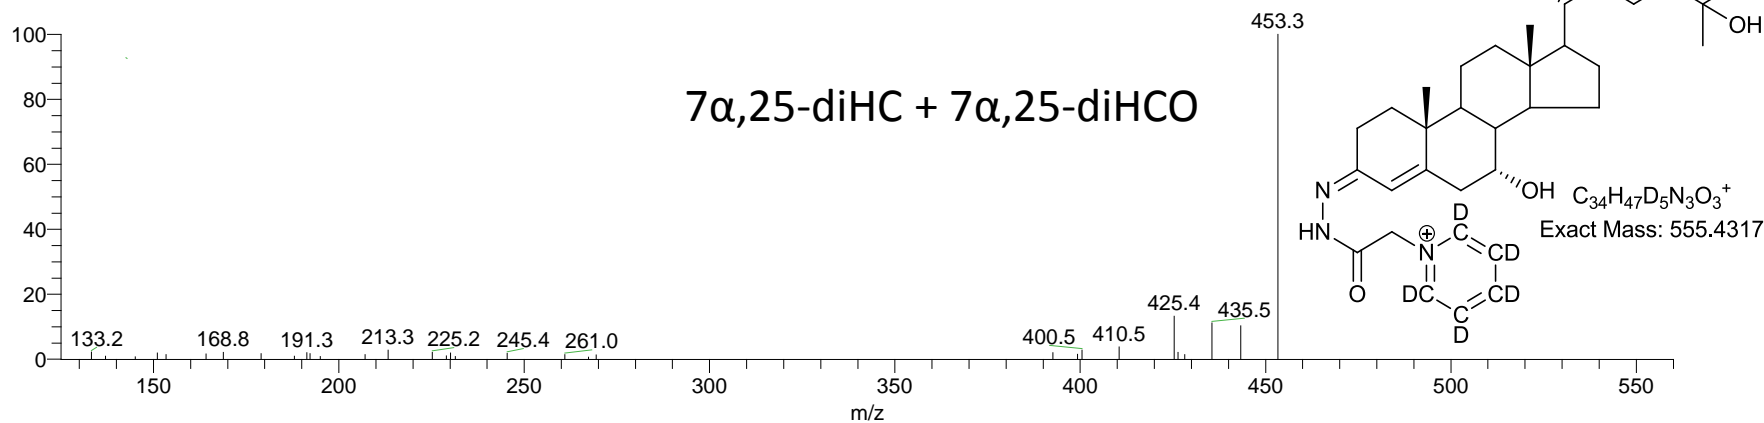

PC\_Plasma\_Mouse\_Bjorkem\_CYP46(16)\_no-hydrolysis\_Fr1a-GPd5\_Fr1b-GPd0\_131108\_04 #966 RT: 5.42 AV: 1 NL: 3.13E2  
F: ITMS + c ESI Full ms3 555.43@cid30.00 471.36@cid35.00 [125.00-560.00]

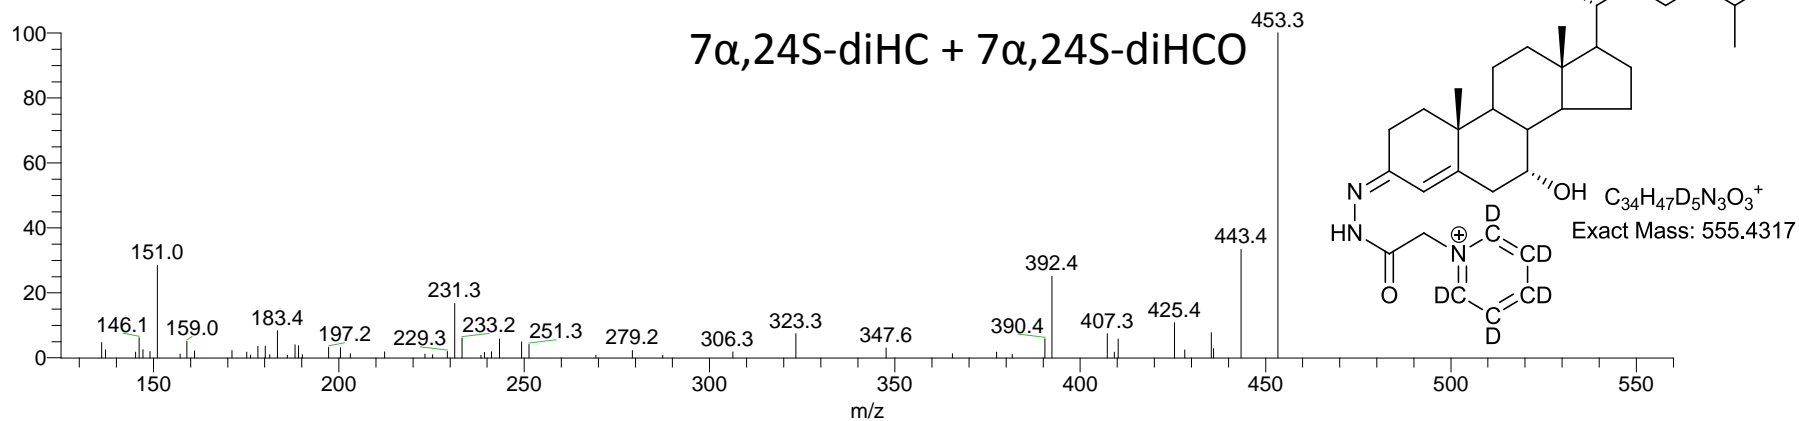

pc\_plasma\_mouse\_jax\_control-101045-2\_...

11/09/13 09:57:01

pc\_plasma\_mouse\_jax\_control-101045-2\_fr1a-gpd5\_fr1b-gpd0\_131108\_...  
F: ITMS + c ESI Full ms3 555.43@cid30.00 471.36@cid35.00 [125.00-56

.93 AV: 2 NL: 4.07E1

WT

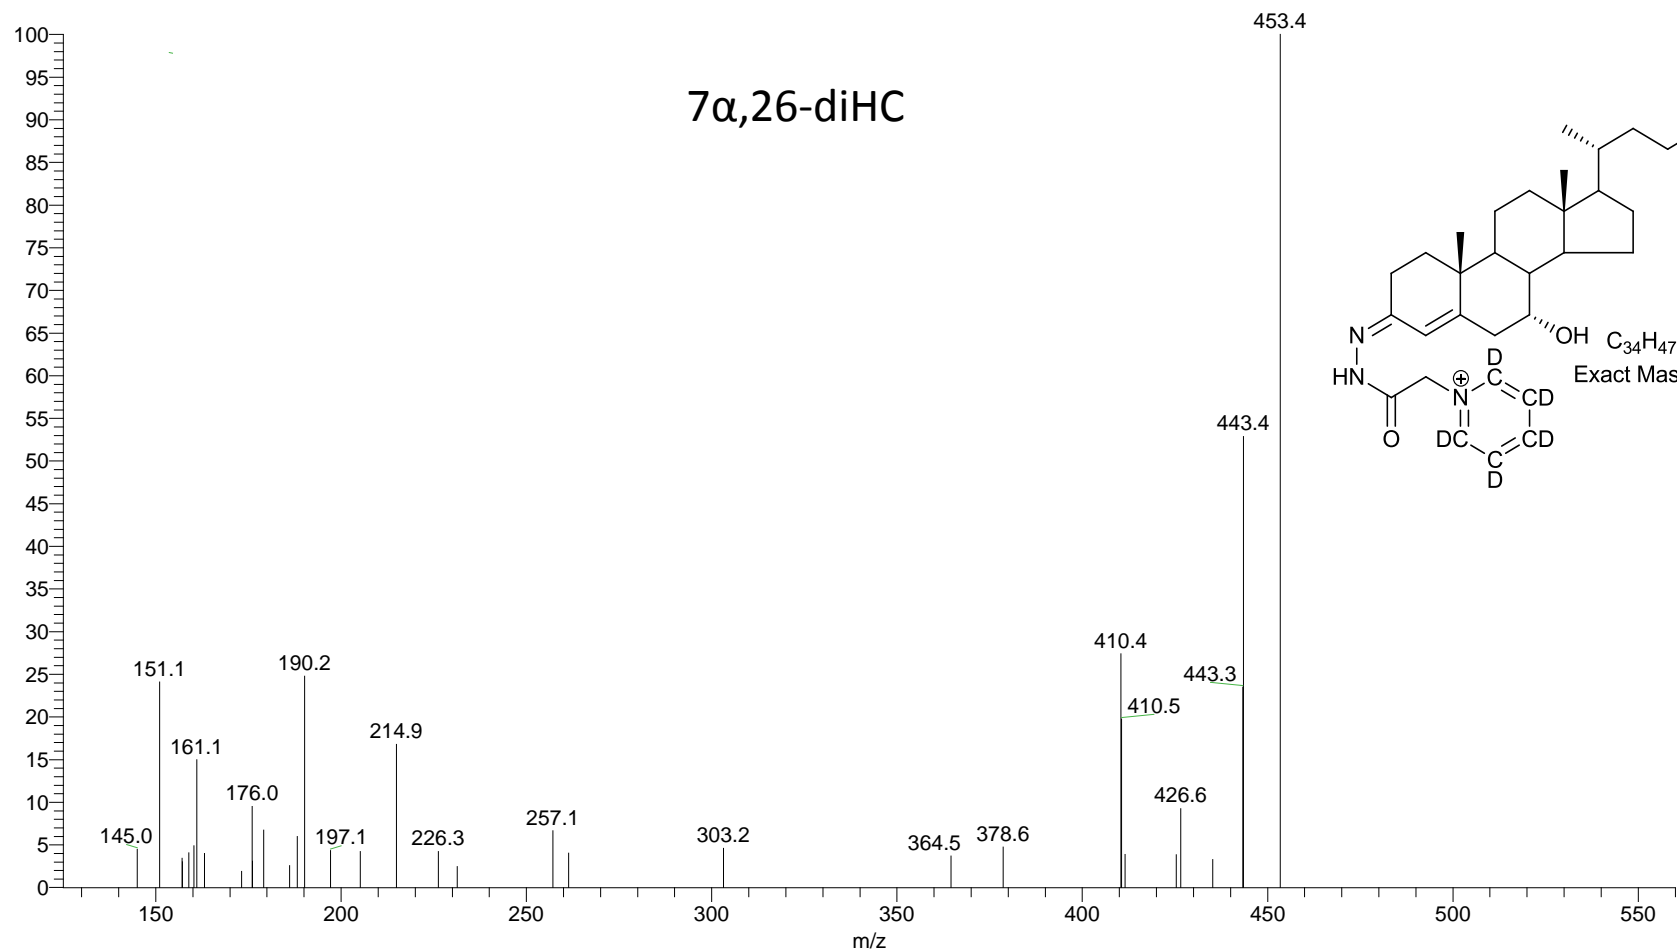

PC\_Plasma\_Mouse\_Bjorkem\_CYP46(16)\_no-...

11/08/13 21:30:41

PC\_Plasma\_Mouse\_Bjorkem\_CYP  
F: ITMS + c ESI Full ms3 550.40@

3Pd5\_Fr1b-GPd0\_131108\_04 #947 RT: 5.32 AV: 1 NL: 3.97E2  
[125.00-560.00]

*CYP46A1tg*

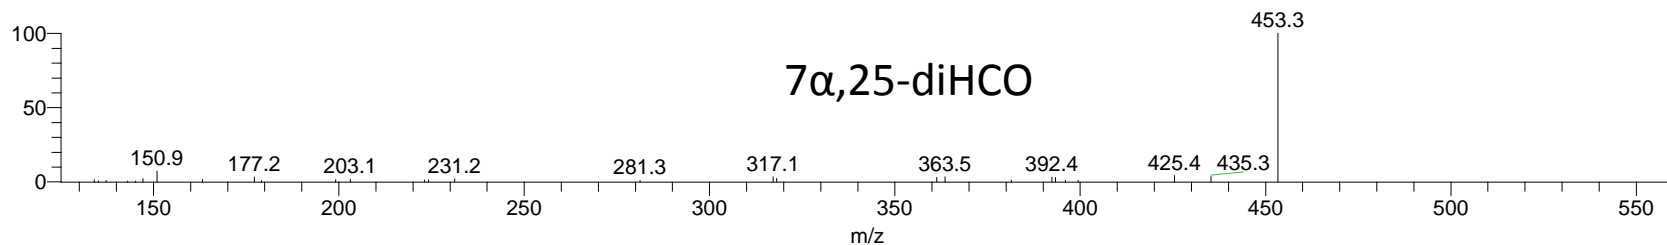

PC\_Plasma\_Mouse\_Bjorkem\_CYP46(16)\_no-hydrolysis\_Fr1a-GPd5\_Fr1b-GPd0\_131108\_04 #968 RT: 5.43 AV: 1 NL: 2.79E2  
F: ITMS + c ESI Full ms3 550.40@cid30.00 471.36@cid35.00 [125.00-560.00]

*CYP46A1tg*

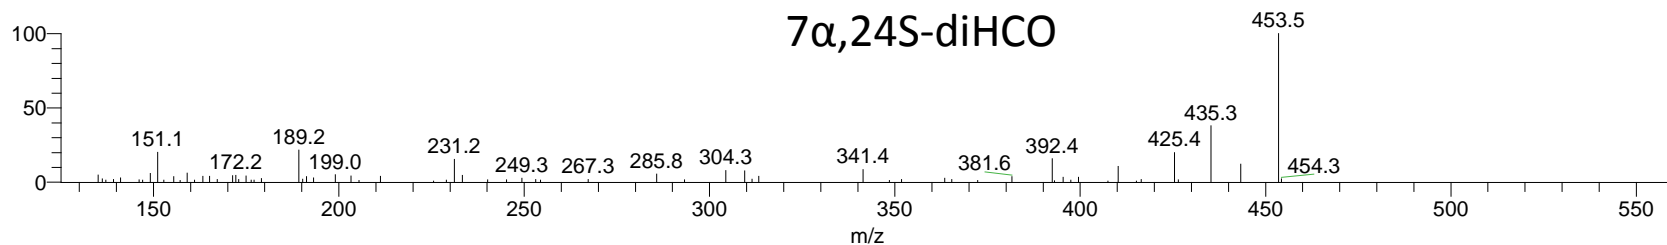

PC\_Plasma\_Mouse\_Bjorkem\_CYP46(16)\_no-hydrolysis\_Fr1a-GPd5\_Fr1b-GPd0\_131108\_04 #1163-1173 RT: 6.54-6.59 AV: 4 NL: 4.17E1  
F: ITMS + c ESI Full ms3 550.40@cid30.00 471.36@cid35.00 [125.00-560.00]

*CYP46A1tg*

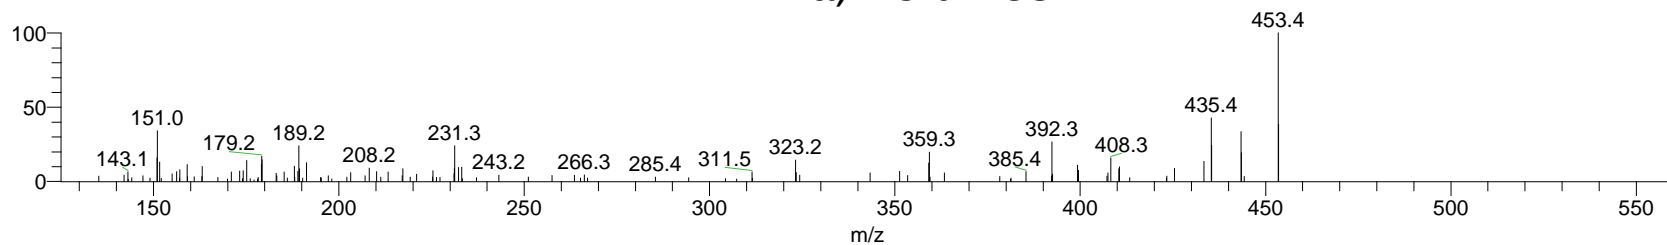

pc\_plasma\_mouse\_jax\_control-101045-2\_...

11/09/13 09:57:01

pc\_plasma\_mouse\_jax\_control-101045-2\_fr1a-gpd5\_fr1b-gpd0\_131108  
F: ITMS + c ESI Full ms3 550.40@cid30.00 471.36@cid35.00 [125.00-5]

.98 AV: 6 NL: 1.82E1

WT

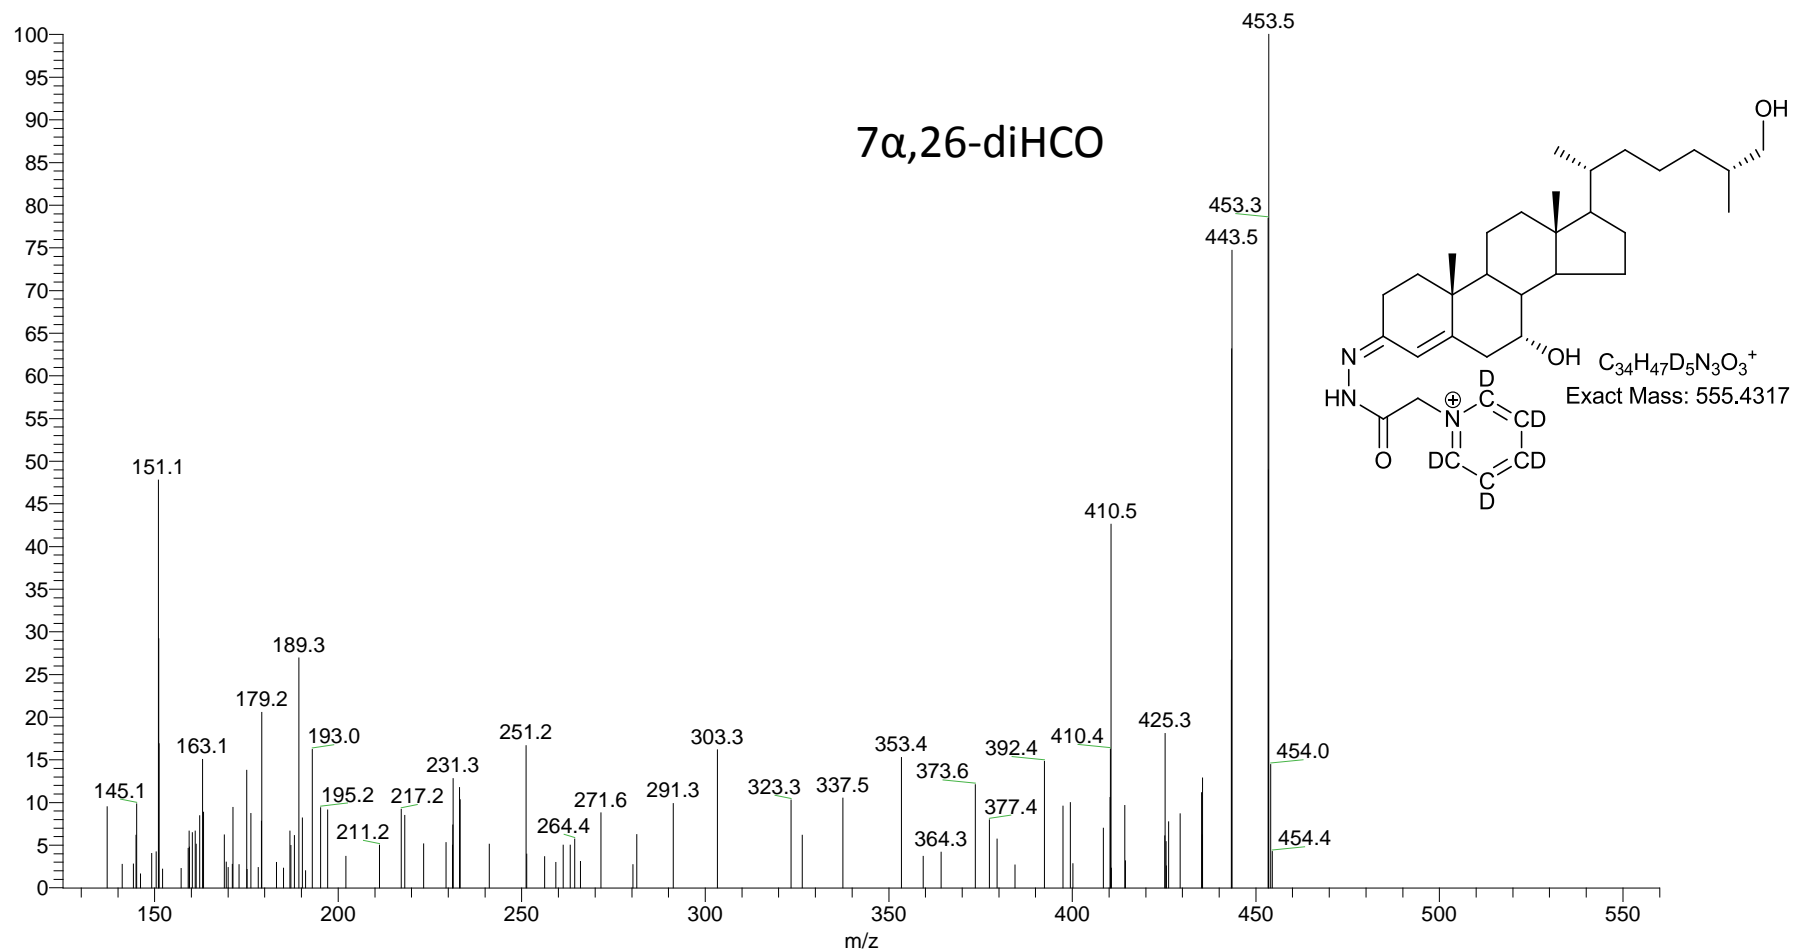

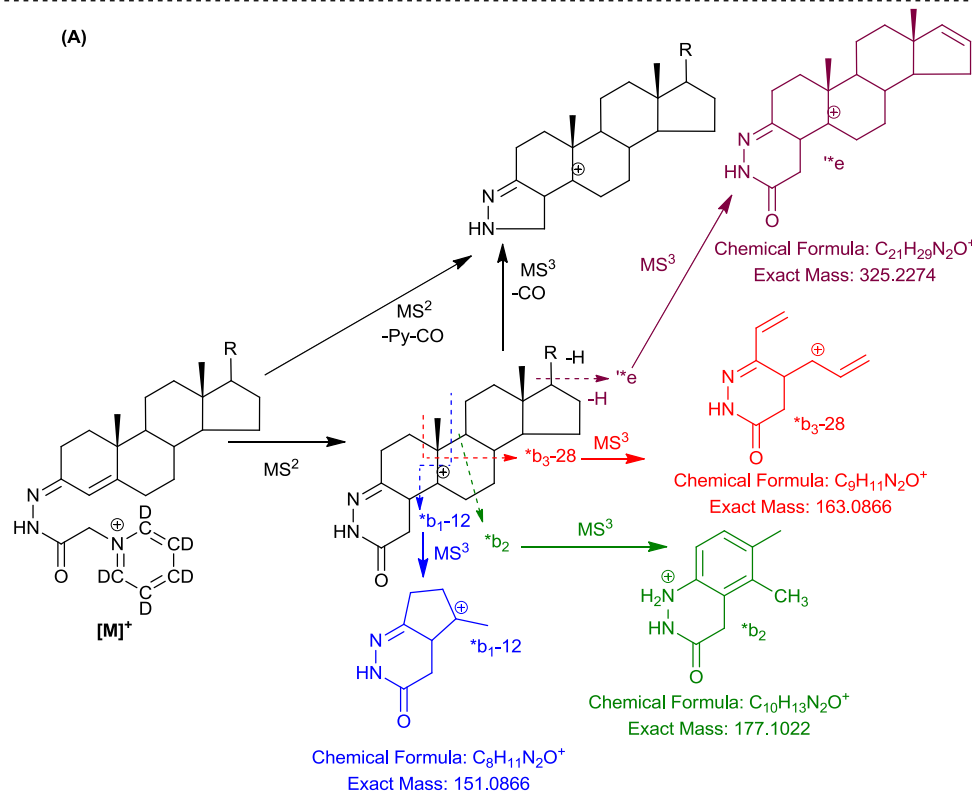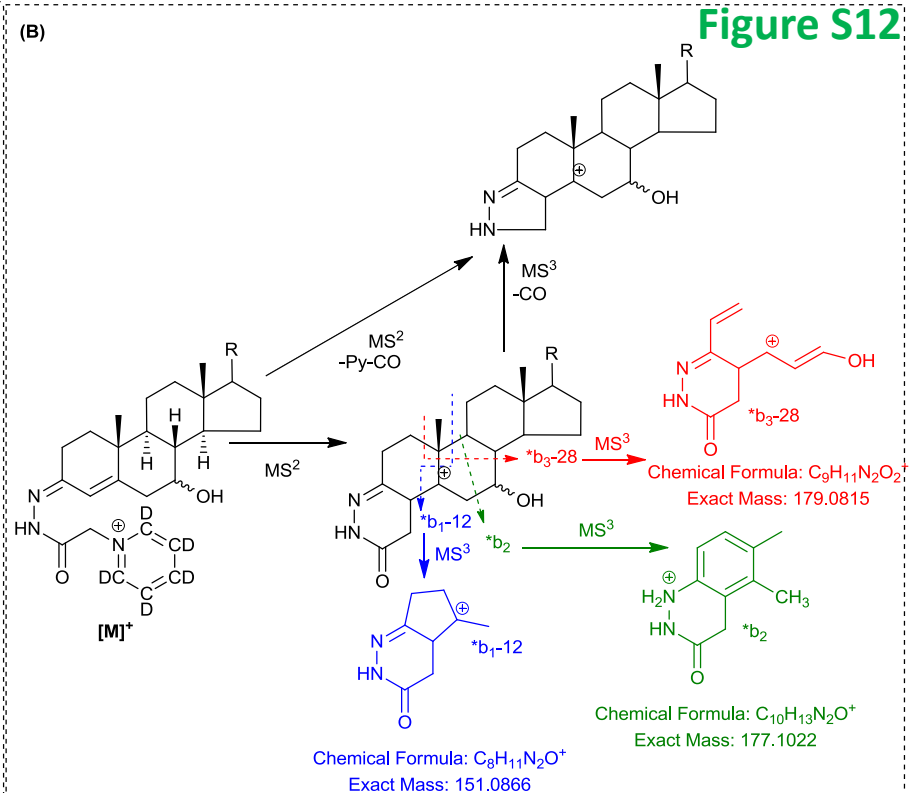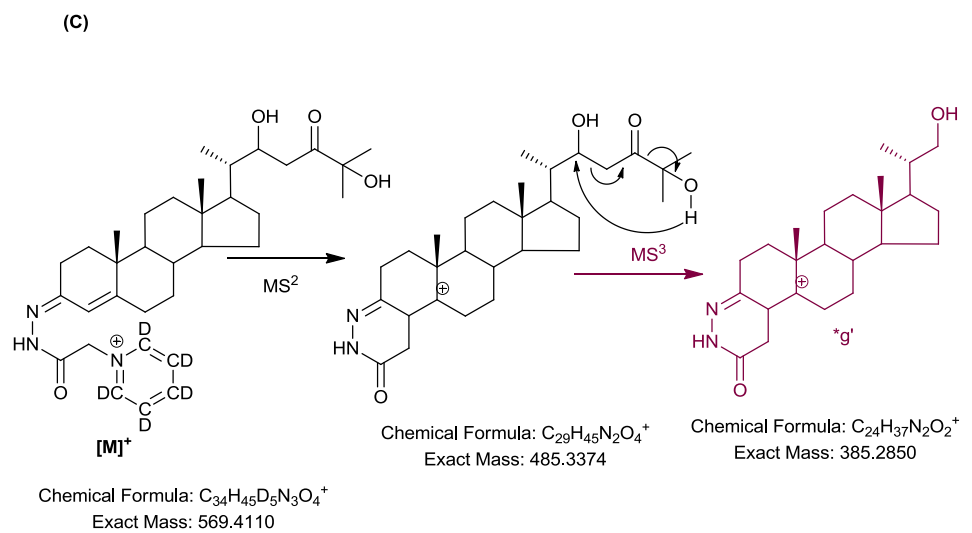

Supplement: mmc1.pdf [file mmc1.pdf]
